# Supplementary material for: Protein Biomarkers of New-Onset Heart Failure: Insights From the Heart Omics and Ageing Cohort, the Atherosclerosis Risk in Communities Study, and the Framingham Heart Study
Source: PubMed Central journal article supplement — Circ Heart Fail. 2023 May 16;16(5):e009694. doi: 10.1161/CIRCHEARTFAILURE.122.009694 (PMC10179982; doi:10.1161/circheartfailure.122.009694), 2023-05-16
Supplement: hhf-16-e009694-s001.pdf [file hhf-16-e009694-s001.pdf]

## **SUPPLEMENTAL MATERIAL**

**Supplemental Table 1: Protein names and respective Olink® panel sorted in alphabetical order**

| <b>Protein full name</b>                                          | <b>Entry name</b> | <b>Olink® Panel</b> | <b>Uniprot ID</b> | <b>Biomarker excluded from the analysis ?</b> |
|-------------------------------------------------------------------|-------------------|---------------------|-------------------|-----------------------------------------------|
| Eukaryotic translation initiation factor 4E-binding protein 1     | 4E-BP1            | INF                 | Q13541            |                                               |
| Angiotensin-converting enzyme 2                                   | ACE2              | CVD II              | Q9BYF1            |                                               |
| Adenosine Deaminase                                               | ADA               | INF                 | P00813            |                                               |
| A disintegrin and metalloproteinase with thrombospondin motifs 13 | ADAM-TS13         | CVD II              | Q76LX8            |                                               |
| ADM                                                               | ADM               | CVD II              | P35318            |                                               |
| Agouti-related protein                                            | AGRP              | CVD II              | O00253            |                                               |
| CD166 antigen                                                     | ALCAM             | CVD III             | Q13740            |                                               |
| Protein AMBP                                                      | AMBP              | CVD II              | P02760            |                                               |
| Angiopoietin-1                                                    | ANG-1             | CVD II              | Q15389            |                                               |
| Aminopeptidase N                                                  | AP-N              | CVD III             | P15144            |                                               |
| Artemin                                                           | ARTN              | INF                 | Q5T4W7            | Excluded                                      |
| Axin-1                                                            | AXIN1             | INF                 | O15169            |                                               |
| Tyrosine-protein kinase receptor UFO                              | AXL               | CVD III             | P30530            |                                               |
| Azurocidin                                                        | AZU1              | CVD III             | P20160            |                                               |
| Brain-derived neurotrophic factor                                 | BDNF              | INF                 | P23560            | Excluded                                      |
| Beta-nerve growth factor                                          | Beta-NGF          | INF                 | P01138            |                                               |
| Bleomycin hydrolase                                               | BLM hydrolase     | CVD III             | Q13867            |                                               |
| Bone morphogenetic protein 6                                      | BMP-6             | CVD II              | P22004            |                                               |
| Natriuretic peptides B                                            | BNP               | CVD II              | P16860            |                                               |
| Brother of CDO                                                    | BOC               | CVD II              | Q9BWW1            |                                               |
| Carbonic anhydrase 5A, mitochondrial                              | CA5A              | CVD II              | P35218            |                                               |
| Caspase-3                                                         | CASP-3            | CVD III             | P42574            |                                               |
| Caspase 8                                                         | CASP-8            | INF                 | Q14790            |                                               |
| Eotaxin-1                                                         | CCL11             | INF                 | P51671            |                                               |
| C-C motif chemokine 15                                            | CCL15             | CVD III             | Q16663            |                                               |
| C-C motif chemokine 16                                            | CCL16             | CVD III             | O15467            |                                               |
| C-C motif chemokine 17                                            | CCL17             | CVD II              | Q92583            |                                               |
| C-C motif chemokine 19                                            | CCL19             | INF                 | Q99731            |                                               |
| C-C motif chemokine 20                                            | CCL20             | INF                 | P78556            |                                               |
| C-C motif chemokine 22                                            | CCL22             | CVD III             | O00626            | Excluded                                      |
| C-C motif chemokine 23                                            | CCL23             | INF                 | P55773            |                                               |
| C-C motif chemokine 24                                            | CCL24             | CVD III             | O00175            |                                               |
| C-C motif chemokine 25                                            | CCL25             | INF                 | O15444            |                                               |
| C-C motif chemokine 28                                            | CCL28             | INF                 | Q9NRJ3            |                                               |
| C-C motif chemokine 3                                             | CCL3              | CVD II              | P10147            |                                               |
| C-C motif chemokine 3                                             | CCL3              | INF                 | P10147            | Excluded                                      |
| C-C motif chemokine 4                                             | CCL4              | INF                 | P13236            |                                               |
| Scavenger receptor cysteine-rich type 1 protein M130              | CD163             | CVD III             | Q86VB7            |                                               |
| Natural killer cell receptor 2B4                                  | CD244             | INF                 | Q9BZW8            |                                               |
| T-cell surface glycoprotein CD4                                   | CD4               | CVD II              | P01730            |                                               |
| CD40L receptor                                                    | CD40              | INF                 | P25942            |                                               |
| CD40 ligand                                                       | CD40-L            | CVD II              | P29965            |                                               |
| T-cell surface glycoprotein CD5                                   | CD5               | INF                 | P06127            |                                               |
| T cell surface glycoprotein CD6 isoform                           | CD6               | INF                 | Q8WWJ7            |                                               |
| SLAM family member 5                                              | CD84              | CVD II              | Q9UIB8            |                                               |
| T-cell surface glycoprotein CD8 alpha chain                       | CD8A              | INF                 | P01732            | Excluded                                      |
| Complement component C1q receptor                                 | CD93              | CVD III             | Q9NPY3            |                                               |
| CUB domain-containing protein 1                                   | CDCP1             | INF                 | Q9H5V8            |                                               |
| Cadherin-5                                                        | CDH5              | CVD III             | P33151            |                                               |
| Carcinoembryonic antigen-related cell adhesion molecule 8         | CEACAM8           | CVD II              | P31997            |                                               |

| <b>Protein full name</b>                                       | <b>Entry name</b> | <b>Olink® Panel</b> | <b>Uniprot ID</b> | <b>Biomarker excluded from the analysis ?</b> |
|----------------------------------------------------------------|-------------------|---------------------|-------------------|-----------------------------------------------|
| Chitinase-3-like protein 1                                     | CHI3L1            | CVD III             | P36222            |                                               |
| Chitotriosidase-1                                              | CHIT1             | CVD III             | Q13231            |                                               |
| Contactin-1                                                    | CNTN1             | CVD III             | Q12860            |                                               |
| Collagen alpha-1 (I) chain                                     | COL1A1            | CVD III             | P02452            |                                               |
| Carboxypeptidase A1                                            | CPA1              | CVD III             | P15085            |                                               |
| Carboxypeptidase B                                             | CPB1              | CVD III             | P15086            |                                               |
| Macrophage colony-stimulating factor 1                         | CSF-1             | INF                 | P09603            |                                               |
| Cystatin D                                                     | CST5              | INF                 | P28325            |                                               |
| Cystatin-B                                                     | CSTB              | CVD III             | P04080            |                                               |
| Chymotrypsin C                                                 | CTRC              | CVD II              | Q99895            |                                               |
| Cathepsin D                                                    | CTSD              | CVD III             | P07339            |                                               |
| Cathepsin L1                                                   | CTSL1             | CVD II              | P07711            |                                               |
| Cathepsin Z                                                    | CTSZ              | CVD III             | Q9UBR2            |                                               |
| Fractalkine                                                    | CX3CL1            | INF                 | P78423            |                                               |
| C-X-C motif chemokine 1                                        | CXCL1             | CVD II              | P09341            |                                               |
| C-X-C motif chemokine 1                                        | CXCL1             | INF                 | P09341            | Excluded                                      |
| C-X-C motif chemokine 10                                       | CXCL10            | INF                 | P02778            |                                               |
| C-X-C motif chemokine 11                                       | CXCL11            | INF                 | O14625            |                                               |
| C-X-C motif chemokine 16                                       | CXCL16            | CVD III             | Q9H2A7            |                                               |
| C-X-C motif chemokine 5                                        | CXCL5             | INF                 | P42830            |                                               |
| C-X-C motif chemokine 6                                        | CXCL6             | INF                 | P80162            |                                               |
| C-X-C motif chemokine 9                                        | CXCL9             | INF                 | Q07325            |                                               |
| Decorin                                                        | DCN               | CVD II              | P07585            |                                               |
| 2,4-dienoyl-CoA reductase, mitochondrial                       | DECR1             | CVD II              | Q16698            |                                               |
| Dickkopf-related protein 1                                     | Dkk-1             | CVD II              | O94907            |                                               |
| Protein delta homolog 1                                        | DLK-1             | CVD III             | P80370            |                                               |
| Delta and Notch-like epidermal growth factor- related receptor | DNER              | INF                 | Q8NFT8            |                                               |
| Epidermal growth factor receptor                               | EGFR              | CVD III             | P00533            |                                               |
| Protein S100-A12                                               | EN-RAGE           | INF                 | P80511            |                                               |
| Epithelial cell adhesion molecule                              | Ep-CAM            | CVD III             | P16422            |                                               |
| Ephrin type-B receptor 4                                       | EPHB4             | CVD III             | P54760            |                                               |
| Fatty acid-binding protein, intestinal                         | FABP2             | CVD II              | P12104            |                                               |
| Fatty acid-binding protein, adipocyte                          | FABP4             | CVD III             | P15090            |                                               |
| Tumor necrosis factor receptor superfamily member 6            | FAS               | CVD III             | P25445            |                                               |
| Fibroblast growth factor 19                                    | FGF-19            | INF                 | O95750            |                                               |
| Fibroblast growth factor 21                                    | FGF-21            | CVD II              | Q9NSA1            |                                               |
| Fibroblast growth factor 21                                    | FGF-21            | INF                 | Q9NSA1            | Excluded                                      |
| Fibroblast growth factor 23                                    | FGF-23            | CVD II              | Q9GZV9            |                                               |
| Fibroblast growth factor 23                                    | FGF-23            | INF                 | Q9GZV9            | Excluded                                      |
| Fibroblast growth factor 5                                     | FGF-5             | INF                 | Q8NF90            |                                               |
| Fms-related tyrosine kinase 3 ligand                           | Flt3L             | INF                 | P49771            |                                               |
| Follistatin                                                    | FS                | CVD II              | P19883            |                                               |
| Galectin-3                                                     | Gal-3             | CVD III             | P17931            |                                               |
| Galectin-4                                                     | Gal-4             | CVD III             | P56470            |                                               |
| Galectin-9                                                     | Gal-9             | CVD II              | O00182            |                                               |
| Growth/differentiation factor 15                               | GDF-15            | CVD III             | Q99988            |                                               |
| Growth/differentiation factor 2                                | GDF-2             | CVD II              | Q9UK05            |                                               |
| Glial cell line-derived neurotrophic factor                    | GDNF              | INF                 | P39905            |                                               |
| Growth hormone                                                 | GH                | CVD II              | P01241            |                                               |
| Gastric intrinsic factor                                       | GIF               | CVD II              | P27352            |                                               |
| Lactoylglutathione lyase                                       | GLO1              | CVD II              | Q04760            |                                               |
| Platelet glycoprotein VI                                       | GP6               | CVD III             | Q9HCN6            | Excluded                                      |
| Granulins                                                      | GRN               | CVD III             | P28799            |                                               |

| <b>Protein full name</b>                                  | <b>Entry name</b>    | <b>Olink® Panel</b> | <b>Uniprot ID</b> | <b>Biomarker excluded from the analysis ?</b> |
|-----------------------------------------------------------|----------------------|---------------------|-------------------|-----------------------------------------------|
| Gastrotropin                                              | GT                   | CVD II              | P51161            |                                               |
| Hydroxyacid oxidase 1                                     | HAOX1                | CVD II              | Q9UJM8            |                                               |
| Proheparin-binding EGF-like growth factor                 | HB-EGF               | CVD II              | Q99075            |                                               |
| Hepatocyte growth factor                                  | HGF                  | INF                 | P14210            |                                               |
| Heme oxygenase 1                                          | HO-1                 | CVD II              | P09601            |                                               |
| Osteoclast-associated immunoglobulin-like receptor        | hOSCAR               | CVD II              | Q8IYS5            |                                               |
| Heat shock 27 kDa protein                                 | HSP 27               | CVD II              | P04792            |                                               |
| Intercellular adhesion molecule 2                         | ICAM-2               | CVD III             | P13598            |                                               |
| Alpha-L-iduronidase                                       | IDUA                 | CVD II              | P35475            |                                               |
| Interferon gamma                                          | IFN-gamma            | INF                 | P01579            | Excluded                                      |
| Insulin-like growth factor-binding protein 1              | IGFBP-1              | CVD III             | P08833            |                                               |
| Insulin-like growth factor-binding protein 2              | IGFBP-2              | CVD III             | P18065            |                                               |
| Insulin-like growth factor-binding protein 7              | IGFBP-7              | CVD III             | Q16270            |                                               |
| Low affinity immunoglobulin gamma Fc region receptor II-b | IgG Fc receptor II-b | CVD II              | P31994            |                                               |
| Interleukin-1 alpha                                       | IL-1 alpha           | INF                 | P01583            | Excluded                                      |
| Interleukin-10                                            | IL10                 | INF                 | P22301            |                                               |
| Interleukin-10 receptor subunit alpha                     | IL-10RA              | INF                 | Q13651            |                                               |
| Interleukin-10 receptor subunit beta                      | IL-10RB              | INF                 | Q08334            |                                               |
| Interleukin-12 subunit beta                               | IL-12B               | INF                 | P29460            |                                               |
| Interleukin-13                                            | IL13                 | INF                 | P35225            | Excluded                                      |
| Interleukin-15 receptor subunit alpha                     | IL-15RA              | INF                 | Q13261            |                                               |
| Pro-interleukin-16                                        | IL16                 | CVD II              | Q14005            |                                               |
| Interleukin-17A                                           | IL-17A               | INF                 | Q16552            |                                               |
| Interleukin-17C                                           | IL-17C               | INF                 | Q9P0M4            |                                               |
| Interleukin-17D                                           | IL-17D               | CVD II              | Q8TAD2            |                                               |
| Interleukin-17 receptor A                                 | IL-17RA              | CVD III             | Q96F46            |                                               |
| Interleukin-18                                            | IL18                 | CVD II              | Q14116            |                                               |
| Interleukin-18                                            | IL18                 | INF                 | Q14116            | Excluded                                      |
| Interleukin-18-binding protein                            | IL-18BP              | CVD III             | Q95998            |                                               |
| Interleukin-18 receptor 1                                 | IL-18R1              | INF                 | Q13478            |                                               |
| Interleukin-1 receptor antagonist protein                 | IL-1ra               | CVD II              | P18510            |                                               |
| Interleukin-1 receptor-like 2                             | IL1RL2               | CVD II              | Q9HB29            |                                               |
| Interleukin-1 receptor type 1                             | IL-1RT1              | CVD III             | P14778            |                                               |
| Interleukin-1 receptor type 2                             | IL-1RT2              | CVD III             | P27930            |                                               |
| Interleukin-2                                             | IL2                  | INF                 | P60568            | Excluded                                      |
| Interleukin-20                                            | IL-20                | INF                 | Q9NYY1            | Excluded                                      |
| Interleukin-20 receptor subunit alpha                     | IL-20RA              | INF                 | Q9UHF4            | Excluded                                      |
| Interleukin-22 receptor subunit alpha-1                   | IL-22 RA1            | INF                 | Q8N6P7            | Excluded                                      |
| Interleukin-24                                            | IL-24                | INF                 | Q13007            | Excluded                                      |
| Interleukin-27                                            | IL-27                | CVD II              | Q8NEV9,Q14213     |                                               |
| Interleukin-2 receptor subunit alpha                      | IL2-RA               | CVD III             | P01589            |                                               |
| Interleukin-2 receptor subunit beta                       | IL-2RB               | INF                 | P14784            | Excluded                                      |
| Interleukin-33                                            | IL33                 | INF                 | Q95760            | Excluded                                      |
| Interleukin-4                                             | IL4                  | INF                 | P05112            | Excluded                                      |
| Interleukin-4 receptor subunit alpha                      | IL-4RA               | CVD II              | P24394            |                                               |
| Interleukin-5                                             | IL5                  | INF                 | P05113            | Excluded                                      |
| Interleukin-6                                             | IL6                  | CVD II              | P05231            |                                               |
| Interleukin-6                                             | IL6                  | INF                 | P05231            | Excluded                                      |
| Interleukin-6 receptor subunit alpha                      | IL-6RA               | CVD III             | P08887            |                                               |
| Interleukin-7                                             | IL7                  | INF                 | P13232            |                                               |
| Interleukin-8                                             | IL8                  | INF                 | P10145            |                                               |
| Melusin                                                   | ITGB1BP2             | CVD II              | Q9UKP3            |                                               |
| Integrin beta-2                                           | ITGB2                | CVD III             | P05107            |                                               |

| <b>Protein full name</b>                                     | <b>Entry name</b> | <b>Olink® Panel</b> | <b>Uniprot ID</b> | <b>Biomarker excluded from the analysis ?</b> |
|--------------------------------------------------------------|-------------------|---------------------|-------------------|-----------------------------------------------|
| Junctional adhesion molecule A                               | JAM-A             | CVD III             | Q9Y624            |                                               |
| Kidney injury molecule 1                                     | KIM1              | CVD II              | Q96D42            |                                               |
| Kallikrein-6                                                 | KLK6              | CVD III             | Q92876            |                                               |
| Latency-associated peptide transforming growth factor beta 1 | LAP TGF-beta-1    | INF                 | P01137            |                                               |
| Low-density lipoprotein receptor                             | LDL receptor      | CVD III             | P01130            |                                               |
| Leptin                                                       | LEP               | CVD II              | P41159            |                                               |
| Leukemia inhibitory factor                                   | LIF               | INF                 | P15018            | Excluded                                      |
| Leukemia inhibitory factor receptor                          | LIF-R             | INF                 | P42702            |                                               |
| Lectin-like oxidized LDL receptor 1                          | LOX-1             | CVD II              | P78380            |                                               |
| Lipoprotein lipase                                           | LPL               | CVD II              | P06858            |                                               |
| Lymphotoxin-beta receptor                                    | LTBR              | CVD III             | P36941            |                                               |
| Macrophage receptor MARCO                                    | MARCO             | CVD II              | Q9UEW3            |                                               |
| Myoglobin                                                    | MB                | CVD III             | P02144            |                                               |
| Monocyte chemotactic protein 1                               | MCP-1             | CVD III             | P13500            |                                               |
| Monocyte chemotactic protein 1                               | MCP-1             | INF                 | P13500            | Excluded                                      |
| Monocyte chemotactic protein 2                               | MCP-2             | INF                 | P80075            |                                               |
| Monocyte chemotactic protein 3                               | MCP-3             | INF                 | P80098            |                                               |
| Monocyte chemotactic protein 4                               | MCP-4             | INF                 | Q99616            |                                               |
| Matrix extracellular phosphoglycoprotein                     | MEPE              | CVD III             | Q9NQ76            |                                               |
| Tyrosine-protein kinase Mer                                  | MERTK             | CVD II              | Q12866            |                                               |
| Matrix metalloproteinase-1                                   | MMP-1             | INF                 | P03956            |                                               |
| Matrix metalloproteinase-10                                  | MMP-10            | INF                 | P09238            |                                               |
| Matrix metalloproteinase-12                                  | MMP12             | CVD II              | P39900            |                                               |
| Matrix metalloproteinase-2                                   | MMP-2             | CVD III             | P08253            |                                               |
| Matrix metalloproteinase-3                                   | MMP-3             | CVD III             | P08254            |                                               |
| Matrix metalloproteinase-7                                   | MMP7              | CVD II              | P09237            |                                               |
| Matrix metalloproteinase-9                                   | MMP-9             | CVD III             | P14780            |                                               |
| Myeloperoxidase                                              | MPO               | CVD III             | P05164            |                                               |
| NF-kappa-B essential modulator                               | NEMO              | CVD II              | Q9Y6K9            |                                               |
| Neurogenic locus notch homolog protein 3                     | Notch 3           | CVD III             | Q9UM47            |                                               |
| Neurturin                                                    | NRTN              | INF                 | Q99748            | Excluded                                      |
| Neurotrophin-3                                               | NT-3              | INF                 | P20783            |                                               |
| N-terminal prohormone brain natriuretic peptide              | NT-proBNP         | CVD III             |                   |                                               |
| Osteoprotegerin                                              | OPG               | CVD III             | O00300            |                                               |
| Osteoprotegerin                                              | OPG               | INF                 | O00300            | Excluded                                      |
| Osteopontin                                                  | OPN               | CVD III             | P10451            |                                               |
| Oncostatin-M                                                 | OSM               | INF                 | P13725            |                                               |
| Plasminogen activator inhibitor 1                            | PAI               | CVD III             | P05121            |                                               |
| Pappalysin-1                                                 | PAPPA             | CVD II              | Q13219            |                                               |
| Proteinase-activated receptor 1                              | PAR-1             | CVD II              | P25116            |                                               |
| Poly [ADP-ribose] polymerase 1                               | PARP-1            | CVD II              | P09874            |                                               |
| Proprotein convertase subtilisin/kexin type 9                | PCSK9             | CVD III             | Q8NBP7            |                                               |
| Platelet-derived growth factor subunit A                     | PDGF subunit A    | CVD III             | P04085            |                                               |
| Platelet-derived growth factor subunit B                     | PDGF subunit B    | CVD II              | P01127            |                                               |
| Programmed cell death 1 ligand 1                             | PD-L1             | INF                 | Q9NZQ7            |                                               |
| Programmed cell death 1 ligand 2                             | PD-L2             | CVD II              | Q9BQ51            |                                               |
| Platelet endothelial cell adhesion molecule                  | PECAM-1           | CVD III             | P16284            |                                               |
| Placenta growth factor                                       | PGF               | CVD II              | P49763            |                                               |
| Peptidoglycan recognition protein 1                          | PGLYRP1           | CVD III             | O75594            |                                               |
| Elafin                                                       | PI3               | CVD III             | P19957            |                                               |
| Polymeric immunoglobulin receptor                            | PIgR              | CVD II              | P01833            |                                               |
| Perlecan                                                     | PLC               | CVD III             | P98160            |                                               |
| Paraoxonase                                                  | PON3              | CVD III             | Q15166            |                                               |

| <b>Protein full name</b>                                   | <b>Entry name</b> | <b>Olink® Panel</b> | <b>Uniprot ID</b> | <b>Biomarker excluded from the analysis ?</b> |
|------------------------------------------------------------|-------------------|---------------------|-------------------|-----------------------------------------------|
| Prolargin                                                  | PRELP             | CVD II              | P51888            |                                               |
| Serine protease 27                                         | PRSS27            | CVD II              | Q9BQR3            |                                               |
| Prostasin                                                  | PRSS8             | CVD II              | Q16651            |                                               |
| Myeloblastin                                               | PRTN3             | CVD III             | P24158            |                                               |
| P-selectin glycoprotein ligand 1                           | PSGL-1            | CVD II              | Q14242            |                                               |
| Pulmonary surfactant-associated protein D                  | PSP-D             | CVD III             | P35247            |                                               |
| Pentraxin-related protein PTX3                             | PTX3              | CVD II              | P26022            |                                               |
| Receptor for advanced glycosylation end products           | RAGE              | CVD II              | Q15109            |                                               |
| Retinoic acid receptor responder protein 2                 | RARRES2           | CVD III             | Q99969            |                                               |
| Renin                                                      | REN               | CVD II              | P00797            |                                               |
| Resistin                                                   | RETN              | CVD III             | Q9HD89            |                                               |
| Stem cell factor                                           | SCF               | CVD II              | P21583            |                                               |
| Stem cell factor                                           | SCF               | INF                 | P21583            | Excluded                                      |
| Secretoglobin family 3A member 2                           | SCGB3A2           | CVD III             | Q96PL1            |                                               |
| E-selectin                                                 | SELE              | CVD III             | P16581            |                                               |
| P-selectin                                                 | SELP              | CVD III             | P16109            |                                               |
| Serpin A12                                                 | SERPINA12         | CVD II              | Q8IW75            |                                               |
| Tyrosine-protein phosphatase non-receptor type substrate 1 | SHPS-1            | CVD III             | P78324            |                                               |
| SIR2-like protein 2                                        | SIRT2             | INF                 | Q8IXJ6            |                                               |
| Signaling lymphocytic activation molecule                  | SLAMF1            | INF                 | Q13291            |                                               |
| SLAM family member 7                                       | SLAMF7            | CVD II              | Q9NQ25            |                                               |
| Superoxide dismutase [Mn], mitochondrial                   | SOD2              | CVD II              | P04179            |                                               |
| Sortilin                                                   | SORT1             | CVD II              | Q99523            |                                               |
| Spondin-1                                                  | SPON1             | CVD III             | Q9HCB6            |                                               |
| Spondin-2                                                  | SPON2             | CVD II              | Q9BUD6            |                                               |
| Proto-oncogene tyrosine-protein kinase Src                 | SRC               | CVD II              | P12931            |                                               |
| Sulfotransferase 1A1                                       | ST1A1             | INF                 | P50225            |                                               |
| ST2 protein                                                | ST2               | CVD III             | Q01638            |                                               |
| STAM-binding protein                                       | STAMPB            | INF                 | Q95630            |                                               |
| Serine/threonine-protein kinase 4                          | STK4              | CVD II              | Q13043            |                                               |
| Tissue factor                                              | TF                | CVD II              | P13726            |                                               |
| Trefoil factor 3                                           | TFF3              | CVD III             | Q07654            |                                               |
| Tissue factor pathway inhibitor                            | TFPI              | CVD III             | P10646            |                                               |
| Transforming growth factor alpha                           | TGF-alpha         | INF                 | P01135            |                                               |
| Protein-glutamine gamma-glutamyltransferase 2              | TGM2              | CVD II              | P21980            |                                               |
| Thrombospondin-2                                           | THBS2             | CVD II              | P35442            |                                               |
| Thrombopoietin                                             | THPO              | CVD II              | P40225            |                                               |
| Angiopoietin-1 receptor                                    | TIE2              | CVD II              | Q02763            |                                               |
| Metalloproteinase inhibitor 4                              | TIMP4             | CVD III             | Q99727            |                                               |
| Trem-like transcript 2 protein                             | TLT-2             | CVD III             | Q5T2D2            |                                               |
| Thrombomodulin TM                                          | TM                | CVD II              | P07204            |                                               |
| Tumor necrosis factor                                      | TNF               | INF                 | P01375            | Excluded                                      |
| TNF-beta                                                   | TNFB              | INF                 | P01374            |                                               |
| Tumor necrosis factor receptor 1                           | TNF-R1            | CVD III             | P19438            |                                               |
| Tumor necrosis factor receptor 2                           | TNF-R2            | CVD III             | P20333            |                                               |
| Tumor necrosis factor receptor superfamily member 10A      | TNFRSF10A         | CVD II              | O00220            |                                               |
| Tumor necrosis factor receptor superfamily member 10C      | TNFRSF10C         | CVD III             | O14798            |                                               |
| Tumor necrosis factor receptor superfamily member 11A      | TNFRSF11A         | CVD II              | Q9Y6Q6            |                                               |
| Tumor necrosis factor receptor superfamily member 13B      | TNFRSF13B         | CVD II              | O14836            |                                               |
| Tumor necrosis factor receptor superfamily member 14       | TNFRSF14          | CVD III             | Q92956            |                                               |
| Tumor necrosis factor receptor superfamily member 9        | TNFRSF9           | INF                 | Q07011            |                                               |
| Tumor necrosis factor ligand superfamily member 13B        | TNFSF13B          | CVD III             | Q9Y275            |                                               |
| Tumor necrosis factor ligand superfamily member 14         | TNFSF14           | INF                 | O43557            |                                               |

| <b>Protein full name</b>                             | <b>Entry name</b> | <b>Olink® Panel</b> | <b>Uniprot ID</b> | <b>Biomarker excluded from the analysis ?</b> |
|------------------------------------------------------|-------------------|---------------------|-------------------|-----------------------------------------------|
| Tissue-type plasminogen activator                    | t-PA              | CVD III             | P00750            |                                               |
| Transferrin receptor protein 1                       | TR                | CVD III             | P02786            |                                               |
| TNF-related apoptosis-inducing ligand                | TRAIL             | INF                 | P50591            |                                               |
| TNF-related apoptosis-inducing ligand receptor 2     | TRAIL-R2          | CVD II              | O14763            |                                               |
| TNF-related activation-induced cytokine              | TRANCE            | INF                 | O14788            |                                               |
| Tartrate-resistant acid phosphatase type 5           | TR-AP             | CVD III             | P13686            |                                               |
| Thymic stromal lymphopoietin                         | TSLP              | INF                 | Q969D9            | Excluded                                      |
| Tumor necrosis factor                                | TWEAK             | INF                 | O43508            |                                               |
| Urokinase-type plasminogen activator                 | uPA               | CVD III             | P00749            |                                               |
| Urokinase-type plasminogen activator                 | uPA               | INF                 | P00749            | Excluded                                      |
| Urokinase plasminogen activator surface receptor     | U-PAR             | CVD III             | Q03405            |                                               |
| Vascular endothelial growth factor A                 | VEGFA             | INF                 | P15692            |                                               |
| Vascular endothelial growth factor D                 | VEGFD             | CVD II              | O43915            |                                               |
| V-set and immunoglobulin domain-containing protein 2 | VSIG2             | CVD II              | Q96IQ7            |                                               |
| von Willebrand factor                                | vWF               | CVD III             | P04275            |                                               |
| Lymphotactin                                         | XCL1              | CVD II              | P47992            |                                               |

**Supplemental Table 2: Association between each biomarker with incident heart failure in logistic regression model adjusted for the matching and clinical variables and correction for multiple comparisons in each cohort**

| Biomarker     | ARIC               |                  |                     | FRAMINGHAM         |                  |                     | HOMAGE             |                  |                     |
|---------------|--------------------|------------------|---------------------|--------------------|------------------|---------------------|--------------------|------------------|---------------------|
|               | OR (CI 95%)        | Original p-value | BH adjusted p-value | OR (CI 95%)        | Original p-value | BH adjusted p-value | OR (CI 95%)        | Original p-value | BH adjusted p-value |
| 4E-BP1        | 0.66 (0.50 - 0.87) | 0.003            | 0.020               | 1.86 (1.31 - 2.63) | 0.0004           | 0.013               | 1.14 (1.04 - 1.26) | 0.007            | 0.021               |
| ACE2          | 1.41 (1.03 - 1.93) | 0.034            | 0.10                | 1.89 (1.28 - 2.80) | 0.001            | 0.028               | 1.47 (1.22 - 1.76) | <0.0001          | 0.0003              |
| ADA           | 0.61 (0.37 - 1.02) | 0.059            | 0.15                | 1.11 (0.61 - 2.00) | 0.73             | 0.87                | 1.02 (0.83 - 1.24) | 0.85             | 0.87                |
| ADAM-TS13     | 0.93 (0.28 - 3.08) | 0.91             | 0.94                | 0.86 (0.18 - 4.13) | 0.85             | 0.92                | 1.31 (0.87 - 1.99) | 0.20             | 0.27                |
| ADM           | 3.59 (2.01 - 6.43) | <0.0001          | 0.0008              | 1.59 (0.85 - 2.98) | 0.14             | 0.36                | 1.67 (1.31 - 2.14) | <0.0001          | 0.0004              |
| AGRP          | 1.78 (1.12 - 2.82) | 0.014            | 0.052               | 1.22 (0.68 - 2.19) | 0.50             | 0.73                | 1.56 (1.24 - 1.97) | 0.0001           | 0.001               |
| ALCAM         | 0.91 (0.41 - 2.00) | 0.80             | 0.86                | 1.13 (0.48 - 2.69) | 0.77             | 0.89                | 1.23 (0.96 - 1.58) | 0.10             | 0.17                |
| AMBP          | 2.20 (0.73 - 6.58) | 0.15             | 0.31                | 1.63 (0.42 - 6.29) | 0.47             | 0.71                | 1.62 (1.05 - 2.50) | 0.030            | 0.059               |
| ANG-1         | 0.69 (0.56 - 0.85) | 0.0005           | 0.006               | 1.03 (0.84 - 1.26) | 0.80             | 0.90                | 1.09 (0.98 - 1.20) | 0.10             | 0.16                |
| AP-N          | 1.27 (0.68 - 2.35) | 0.45             | 0.59                | 0.93 (0.43 - 2.00) | 0.85             | 0.92                | 1.15 (0.88 - 1.50) | 0.30             | 0.37                |
| AXIN1         | 0.67 (0.53 - 0.84) | 0.0005           | 0.006               | 1.03 (0.77 - 1.37) | 0.85             | 0.92                | 1.06 (0.96 - 1.16) | 0.23             | 0.30                |
| AXL           | 0.88 (0.47 - 1.67) | 0.69             | 0.79                | 1.01 (0.55 - 1.86) | 0.96             | 0.97                | 1.16 (0.92 - 1.46) | 0.19             | 0.27                |
| AZU1          | 1.25 (0.83 - 1.89) | 0.29             | 0.44                | 1.19 (0.76 - 1.87) | 0.43             | 0.68                | 1.08 (0.95 - 1.24) | 0.23             | 0.30                |
| Beta-NGF      | 0.69 (0.36 - 1.32) | 0.26             | 0.43                | 1.01 (0.44 - 2.32) | 0.98             | 0.98                | 1.25 (0.95 - 1.64) | 0.11             | 0.17                |
| BLM hydrolase | 0.55 (0.31 - 0.98) | 0.042            | 0.12                | 0.78 (0.41 - 1.50) | 0.46             | 0.71                | 1.15 (0.91 - 1.44) | 0.23             | 0.30                |
| BMP-6         | 0.91 (0.62 - 1.32) | 0.61             | 0.73                | 1.63 (0.87 - 3.04) | 0.12             | 0.33                | 1.12 (0.98 - 1.29) | 0.095            | 0.15                |
| BNP           | 1.65 (1.40 - 1.93) | <0.0001          | <0.0001             | 1.88 (1.42 - 2.48) | <0.0001          | 0.0009              | 1.66 (1.50 - 1.85) | <0.0001          | <0.0001             |
| BOC           | 2.80 (1.19 - 6.60) | 0.018            | 0.062               | 0.81 (0.34 - 1.93) | 0.64             | 0.82                | 1.29 (0.99 - 1.68) | 0.060            | 0.10                |
| CA5A          | 1.02 (0.82 - 1.27) | 0.88             | 0.92                | 1.36 (0.97 - 1.90) | 0.072            | 0.25                | 0.98 (0.86 - 1.11) | 0.70             | 0.75                |
| CASP-3        | 0.66 (0.53 - 0.81) | <0.0001          | 0.002               | 1.11 (0.84 - 1.46) | 0.46             | 0.71                | 1.08 (0.99 - 1.18) | 0.070            | 0.12                |
| CASP-8        | 0.64 (0.45 - 0.91) | 0.012            | 0.049               | 1.49 (0.83 - 2.68) | 0.18             | 0.40                | 1.22 (1.10 - 1.36) | 0.0002           | 0.001               |
| CCL11         | 0.90 (0.56 - 1.45) | 0.66             | 0.76                | 1.50 (0.88 - 2.58) | 0.13             | 0.35                | 1.40 (1.13 - 1.75) | 0.002            | 0.008               |
| CCL15         | 0.97 (0.67 - 1.39) | 0.85             | 0.90                | 1.40 (0.85 - 2.31) | 0.19             | 0.41                | 1.30 (1.08 - 1.57) | 0.006            | 0.017               |
| CCL16         | 0.75 (0.55 - 1.02) | 0.070            | 0.17                | 1.30 (0.85 - 1.98) | 0.22             | 0.44                | 1.47 (1.24 - 1.73) | <0.0001          | 0.0001              |
| CCL17         | 0.72 (0.60 - 0.88) | 0.0009           | 0.009               | 1.18 (0.88 - 1.57) | 0.26             | 0.50                | 1.16 (1.05 - 1.29) | 0.004            | 0.015               |
| CCL19         | 1.44 (1.13 - 1.82) | 0.002            | 0.018               | 1.25 (0.96 - 1.62) | 0.099            | 0.30                | 1.12 (1.00 - 1.26) | 0.052            | 0.095               |
| CCL20         | 1.05 (0.88 - 1.25) | 0.59             | 0.71                | 1.03 (0.84 - 1.26) | 0.75             | 0.89                | 1.12 (1.02 - 1.23) | 0.021            | 0.047               |
| CCL23         | 1.33 (0.89 - 1.99) | 0.15             | 0.31                | 1.20 (0.73 - 1.98) | 0.47             | 0.71                | 1.29 (1.04 - 1.60) | 0.022            | 0.049               |
| CCL24         | 1.01 (0.82 - 1.26) | 0.90             | 0.94                | 1.09 (0.87 - 1.36) | 0.47             | 0.71                | 1.00 (0.89 - 1.12) | 0.97             | 0.97                |



| Biomarker | ARIC               |                  |                     | FRAMINGHAM         |                  |                     | HOMAGE             |                  |                     |
|-----------|--------------------|------------------|---------------------|--------------------|------------------|---------------------|--------------------|------------------|---------------------|
|           | OR (CI 95%)        | Original p-value | BH adjusted p-value | OR (CI 95%)        | Original p-value | BH adjusted p-value | OR (CI 95%)        | Original p-value | BH adjusted p-value |
| CCL25     | 1.26 (0.86 - 1.86) | 0.23             | 0.40                | 1.42 (0.94 - 2.14) | 0.093            | 0.29                | 1.16 (0.95 - 1.41) | 0.14             | 0.21                |
| CCL28     | 0.89 (0.53 - 1.52) | 0.67             | 0.77                | 1.39 (0.75 - 2.60) | 0.29             | 0.52                | 1.12 (0.92 - 1.36) | 0.27             | 0.33                |
| CCL3      | 0.85 (0.64 - 1.12) | 0.24             | 0.40                | 1.40 (0.95 - 2.05) | 0.087            | 0.28                | 1.05 (0.94 - 1.18) | 0.39             | 0.47                |
| CCL4      | 0.81 (0.60 - 1.10) | 0.17             | 0.33                | 1.37 (0.99 - 1.90) | 0.055            | 0.22                | 1.07 (0.93 - 1.24) | 0.33             | 0.40                |
| CD163     | 1.17 (0.76 - 1.79) | 0.46             | 0.60                | 1.22 (0.76 - 1.94) | 0.40             | 0.66                | 1.19 (1.00 - 1.43) | 0.054            | 0.098               |
| CD244     | 0.65 (0.38 - 1.11) | 0.11             | 0.24                | 1.32 (0.66 - 2.63) | 0.43             | 0.68                | 1.04 (0.82 - 1.32) | 0.72             | 0.77                |
| CD4       | 1.93 (1.01 - 3.67) | 0.045            | 0.12                | 1.38 (0.71 - 2.66) | 0.34             | 0.58                | 1.65 (1.28 - 2.13) | 0.0001           | 0.0009              |
| CD40      | 1.49 (0.86 - 2.58) | 0.15             | 0.31                | 2.62 (1.33 - 5.16) | 0.005            | 0.064               | 1.45 (1.16 - 1.81) | 0.001            | 0.004               |
| CD40-L    | 0.65 (0.52 - 0.82) | 0.0002           | 0.004               | 1.06 (0.78 - 1.45) | 0.70             | 0.86                | 1.10 (1.01 - 1.19) | 0.029            | 0.059               |
| CD5       | 1.40 (0.92 - 2.14) | 0.11             | 0.24                | 0.96 (0.53 - 1.72) | 0.87             | 0.92                | 1.09 (0.88 - 1.36) | 0.41             | 0.48                |
| CD6       | 1.25 (0.89 - 1.76) | 0.20             | 0.37                | 0.82 (0.50 - 1.35) | 0.43             | 0.68                | 0.99 (0.83 - 1.19) | 0.94             | 0.94                |
| CD84      | 0.52 (0.33 - 0.82) | 0.004            | 0.024               | 0.70 (0.37 - 1.33) | 0.27             | 0.51                | 1.23 (0.97 - 1.56) | 0.085            | 0.13                |
| CD93      | 2.39 (1.29 - 4.43) | 0.005            | 0.027               | 1.22 (0.57 - 2.65) | 0.60             | 0.81                | 1.42 (1.06 - 1.89) | 0.018            | 0.043               |
| CDCP1     | 0.78 (0.57 - 1.07) | 0.12             | 0.26                | 1.42 (0.96 - 2.09) | 0.079            | 0.27                | 1.11 (0.94 - 1.31) | 0.21             | 0.28                |
| CDH5      | 0.85 (0.48 - 1.50) | 0.58             | 0.69                | 1.23 (0.64 - 2.37) | 0.52             | 0.75                | 1.04 (0.84 - 1.29) | 0.74             | 0.78                |
| CEACAM8   | 1.82 (1.26 - 2.64) | 0.001            | 0.013               | 1.98 (1.17 - 3.33) | 0.010            | 0.095               | 1.41 (1.20 - 1.66) | <0.0001          | 0.0003              |
| CHI3L1    | 1.12 (0.92 - 1.38) | 0.26             | 0.43                | 0.99 (0.77 - 1.26) | 0.91             | 0.94                | 1.17 (1.03 - 1.32) | 0.012            | 0.031               |
| CHIT1     | 0.94 (0.83 - 1.05) | 0.26             | 0.43                | 0.98 (0.82 - 1.18) | 0.85             | 0.92                | 1.06 (0.98 - 1.15) | 0.12             | 0.18                |
| CNTN1     | 0.55 (0.29 - 1.06) | 0.072            | 0.17                | 0.75 (0.40 - 1.39) | 0.35             | 0.59                | 0.85 (0.67 - 1.07) | 0.16             | 0.23                |
| COL1A1    | 0.99 (0.60 - 1.63) | 0.96             | 0.96                | 0.84 (0.47 - 1.48) | 0.53             | 0.75                | 1.09 (0.86 - 1.38) | 0.46             | 0.54                |
| CPA1      | 1.03 (0.82 - 1.31) | 0.78             | 0.84                | 1.18 (0.91 - 1.54) | 0.21             | 0.44                | 1.03 (0.90 - 1.18) | 0.65             | 0.70                |
| CPB1      | 1.09 (0.85 - 1.39) | 0.51             | 0.65                | 1.20 (0.90 - 1.60) | 0.20             | 0.43                | 1.12 (0.97 - 1.29) | 0.12             | 0.19                |
| CSF-1     | 2.54 (0.94 - 6.87) | 0.065            | 0.16                | 2.62 (0.95 - 7.20) | 0.062            | 0.23                | 1.42 (1.02 - 1.98) | 0.038            | 0.071               |
| CST5      | 0.59 (0.42 - 0.85) | 0.004            | 0.023               | 0.96 (0.59 - 1.58) | 0.87             | 0.92                | 1.05 (0.86 - 1.28) | 0.61             | 0.67                |
| CSTB      | 0.86 (0.58 - 1.27) | 0.44             | 0.58                | 2.18 (1.22 - 3.91) | 0.008            | 0.090               | 1.44 (1.22 - 1.69) | <0.0001          | 0.0002              |
| CTRC      | 1.15 (0.91 - 1.44) | 0.24             | 0.40                | 0.95 (0.73 - 1.23) | 0.67             | 0.84                | 0.97 (0.85 - 1.11) | 0.63             | 0.69                |
| CTSD      | 1.19 (0.78 - 1.82) | 0.40             | 0.56                | 1.38 (0.82 - 2.33) | 0.22             | 0.45                | 1.02 (0.83 - 1.26) | 0.82             | 0.84                |
| CTSL1     | 1.77 (1.00 - 3.14) | 0.049            | 0.13                | 1.50 (0.77 - 2.94) | 0.23             | 0.46                | 1.33 (1.03 - 1.71) | 0.026            | 0.054               |
| CTSZ      | 1.33 (0.79 - 2.26) | 0.28             | 0.43                | 1.84 (0.99 - 3.41) | 0.052            | 0.22                | 1.31 (1.04 - 1.66) | 0.021            | 0.047               |
| CX3CL1    | 0.73 (0.44 - 1.23) | 0.24             | 0.40                | 0.63 (0.35 - 1.12) | 0.11             | 0.31                | 1.16 (0.93 - 1.45) | 0.17             | 0.24                |
| CXCL1     | 0.68 (0.55 - 0.82) | <0.0001          | 0.002               | 1.05 (0.85 - 1.29) | 0.64             | 0.82                | 1.04 (0.93 - 1.16) | 0.52             | 0.59                |
| CXCL10    | 1.11 (0.89 - 1.39) | 0.34             | 0.48                | 1.36 (1.02 - 1.82) | 0.037            | 0.20                | 1.18 (1.04 - 1.34) | 0.012            | 0.031               |
| CXCL11    | 0.81 (0.64 - 1.02) | 0.075            | 0.18                | 1.19 (0.88 - 1.60) | 0.25             | 0.49                | 1.24 (1.11 - 1.38) | <0.0001          | 0.0007              |
| CXCL16    | 0.80 (0.45 - 1.43) | 0.45             | 0.59                | 3.42 (1.39 - 8.41) | 0.007            | 0.083               | 1.40 (1.07 - 1.82) | 0.012            | 0.031               |

| Biomarker | ARIC               |                  |                     | FRAMINGHAM          |                  |                     | HOMAGE             |                  |                     |
|-----------|--------------------|------------------|---------------------|---------------------|------------------|---------------------|--------------------|------------------|---------------------|
|           | OR (CI 95%)        | Original p-value | BH adjusted p-value | OR (CI 95%)         | Original p-value | BH adjusted p-value | OR (CI 95%)        | Original p-value | BH adjusted p-value |
| CXCL5     | 0.74 (0.64 - 0.85) | <0.0001          | 0.0008              | 1.05 (0.88 - 1.24)  | 0.61             | 0.81                | 1.02 (0.95 - 1.09) | 0.64             | 0.69                |
| CXCL6     | 0.79 (0.61 - 1.03) | 0.081            | 0.19                | 1.01 (0.75 - 1.36)  | 0.95             | 0.97                | 1.10 (0.97 - 1.25) | 0.13             | 0.19                |
| CXCL9     | 1.30 (1.02 - 1.66) | 0.036            | 0.11                | 1.37 (1.00 - 1.88)  | 0.053            | 0.22                | 1.30 (1.12 - 1.50) | 0.0004           | 0.002               |
| DCN       | 1.26 (0.70 - 2.27) | 0.43             | 0.58                | 0.92 (0.44 - 1.94)  | 0.82             | 0.92                | 1.22 (0.95 - 1.57) | 0.11             | 0.17                |
| DECR1     | 0.72 (0.55 - 0.93) | 0.011            | 0.048               | 1.08 (0.87 - 1.33)  | 0.51             | 0.73                | 1.10 (1.01 - 1.19) | 0.021            | 0.047               |
| Dkk-1     | 0.50 (0.33 - 0.77) | 0.001            | 0.013               | 0.84 (0.58 - 1.21)  | 0.34             | 0.58                | 1.21 (1.03 - 1.43) | 0.022            | 0.049               |
| DLK-1     | 0.93 (0.66 - 1.32) | 0.69             | 0.78                | 0.82 (0.55 - 1.22)  | 0.32             | 0.57                | 0.92 (0.77 - 1.09) | 0.32             | 0.40                |
| DNER      | 0.27 (0.13 - 0.58) | 0.0007           | 0.008               | 0.43 (0.16 - 1.12)  | 0.083            | 0.28                | 0.73 (0.55 - 0.96) | 0.025            | 0.053               |
| EGFR      | 0.31 (0.13 - 0.77) | 0.011            | 0.048               | 0.67 (0.24 - 1.91)  | 0.45             | 0.70                | 0.87 (0.65 - 1.17) | 0.34             | 0.42                |
| EN-RAGE   | 1.21 (0.92 - 1.60) | 0.17             | 0.33                | 1.56 (1.08 - 2.26)  | 0.017            | 0.13                | 1.30 (1.14 - 1.49) | 0.0001           | 0.0009              |
| Ep-CAM    | 0.85 (0.70 - 1.04) | 0.11             | 0.24                | 1.05 (0.83 - 1.32)  | 0.69             | 0.86                | 0.98 (0.88 - 1.09) | 0.72             | 0.77                |
| EPHB4     | 1.30 (0.71 - 2.38) | 0.39             | 0.55                | 1.68 (0.74 - 3.78)  | 0.21             | 0.43                | 1.39 (1.08 - 1.80) | 0.011            | 0.030               |
| FABP2     | 1.13 (0.85 - 1.51) | 0.40             | 0.55                | 1.20 (0.87 - 1.63)  | 0.26             | 0.49                | 1.19 (1.02 - 1.39) | 0.029            | 0.059               |
| FABP4     | 1.09 (0.76 - 1.55) | 0.64             | 0.74                | 1.54 (1.01 - 2.36)  | 0.046            | 0.21                | 1.44 (1.22 - 1.70) | <0.0001          | 0.0001              |
| FAS       | 1.29 (0.83 - 2.00) | 0.25             | 0.42                | 1.63 (0.80 - 3.32)  | 0.18             | 0.40                | 1.45 (1.13 - 1.85) | 0.003            | 0.010               |
| FGF-19    | 0.86 (0.69 - 1.05) | 0.14             | 0.29                | 1.08 (0.83 - 1.40)  | 0.57             | 0.79                | 1.05 (0.93 - 1.19) | 0.41             | 0.48                |
| FGF-21    | 1.24 (1.04 - 1.47) | 0.014            | 0.052               | 1.06 (0.89 - 1.26)  | 0.53             | 0.75                | 1.07 (0.98 - 1.16) | 0.13             | 0.19                |
| FGF-23    | 1.58 (1.13 - 2.21) | 0.007            | 0.033               | 1.67 (1.02 - 2.72)  | 0.041            | 0.20                | 1.53 (1.30 - 1.80) | <0.0001          | <0.0001             |
| FGF-5     | 1.56 (0.51 - 4.79) | 0.43             | 0.58                | 0.81 (0.43 - 1.50)  | 0.49             | 0.73                | 1.06 (0.77 - 1.45) | 0.72             | 0.77                |
| Flt3L     | 0.90 (0.60 - 1.37) | 0.63             | 0.74                | 1.05 (0.64 - 1.72)  | 0.84             | 0.92                | 1.09 (0.87 - 1.36) | 0.47             | 0.55                |
| FS        | 1.52 (0.94 - 2.47) | 0.089            | 0.20                | 1.25 (0.78 - 2.01)  | 0.35             | 0.59                | 1.31 (1.04 - 1.65) | 0.020            | 0.046               |
| Gal-3     | 0.62 (0.35 - 1.10) | 0.10             | 0.22                | 1.66 (0.83 - 3.32)  | 0.14             | 0.36                | 1.28 (1.05 - 1.57) | 0.015            | 0.037               |
| Gal-4     | 1.47 (1.00 - 2.15) | 0.048            | 0.13                | 2.46 (1.51 - 4.00)  | 0.0002           | 0.010               | 1.45 (1.19 - 1.77) | 0.0002           | 0.001               |
| Gal-9     | 2.71 (1.36 - 5.38) | 0.004            | 0.024               | 4.40 (1.73 - 11.20) | 0.001            | 0.035               | 2.30 (1.69 - 3.14) | <0.0001          | <0.0001             |
| GDF-15    | 1.62 (1.10 - 2.39) | 0.014            | 0.052               | 3.53 (2.05 - 6.09)  | <0.0001          | 0.0006              | 2.00 (1.61 - 2.48) | <0.0001          | <0.0001             |
| GDF-2     | 0.93 (0.57 - 1.53) | 0.78             | 0.84                | 0.52 (0.28 - 0.97)  | 0.039            | 0.20                | 1.06 (0.90 - 1.24) | 0.49             | 0.56                |
| GDNF      | 0.82 (0.54 - 1.24) | 0.34             | 0.49                | 1.58 (0.84 - 2.99)  | 0.15             | 0.36                | 1.05 (0.83 - 1.33) | 0.68             | 0.73                |
| GH        | 1.05 (0.93 - 1.19) | 0.41             | 0.56                | 1.12 (0.98 - 1.28)  | 0.085            | 0.28                | 1.04 (0.97 - 1.12) | 0.22             | 0.29                |
| GIF       | 1.10 (0.93 - 1.30) | 0.27             | 0.43                | 1.04 (0.82 - 1.31)  | 0.74             | 0.88                | 1.01 (0.91 - 1.11) | 0.91             | 0.91                |
| GLO1      | 0.68 (0.49 - 0.94) | 0.020            | 0.068               | 1.54 (0.98 - 2.40)  | 0.059            | 0.22                | 1.07 (0.92 - 1.24) | 0.40             | 0.48                |
| GRN       | 1.23 (0.72 - 2.10) | 0.44             | 0.58                | 0.99 (0.47 - 2.11)  | 0.98             | 0.98                | 1.49 (1.10 - 2.02) | 0.009            | 0.025               |
| GT        | 0.95 (0.70 - 1.29) | 0.74             | 0.82                | 0.97 (0.69 - 1.37)  | 0.87             | 0.92                | 1.19 (1.02 - 1.39) | 0.023            | 0.049               |
| HAOX1     | 1.05 (0.91 - 1.22) | 0.50             | 0.64                | 1.12 (0.95 - 1.33)  | 0.18             | 0.40                | 0.95 (0.86 - 1.04) | 0.23             | 0.30                |
| HB-EGF    | 0.51 (0.35 - 0.73) | 0.0002           | 0.004               | 0.95 (0.54 - 1.66)  | 0.84             | 0.92                | 1.29 (1.04 - 1.59) | 0.021            | 0.047               |

| Biomarker            | ARIC               |                  |                     | FRAMINGHAM         |                  |                     | HOMAGE             |                  |                     |
|----------------------|--------------------|------------------|---------------------|--------------------|------------------|---------------------|--------------------|------------------|---------------------|
|                      | OR (CI 95%)        | Original p-value | BH adjusted p-value | OR (CI 95%)        | Original p-value | BH adjusted p-value | OR (CI 95%)        | Original p-value | BH adjusted p-value |
| HGF                  | 2.12 (1.25 - 3.61) | 0.005            | 0.027               | 3.84 (2.00 - 7.40) | <0.0001          | 0.003               | 1.61 (1.28 - 2.03) | <0.0001          | 0.0004              |
| HO-1                 | 0.70 (0.40 - 1.21) | 0.20             | 0.37                | 0.83 (0.49 - 1.42) | 0.49             | 0.73                | 1.22 (0.96 - 1.57) | 0.10             | 0.17                |
| hOSCAR               | 1.53 (0.66 - 3.58) | 0.32             | 0.46                | 1.26 (0.50 - 3.14) | 0.62             | 0.82                | 1.63 (1.13 - 2.35) | 0.009            | 0.025               |
| HSP 27               | 0.27 (0.13 - 0.55) | 0.0002           | 0.004               | 1.06 (0.68 - 1.65) | 0.78             | 0.89                | 1.44 (1.15 - 1.81) | 0.001            | 0.006               |
| ICAM-2               | 0.92 (0.55 - 1.53) | 0.75             | 0.82                | 1.08 (0.60 - 1.94) | 0.80             | 0.90                | 1.37 (1.09 - 1.73) | 0.007            | 0.021               |
| IDUA                 | 1.24 (0.84 - 1.82) | 0.27             | 0.43                | 1.07 (0.70 - 1.63) | 0.75             | 0.89                | 1.10 (0.91 - 1.32) | 0.33             | 0.40                |
| IGFBP-1              | 1.18 (0.94 - 1.49) | 0.15             | 0.30                | 1.14 (0.90 - 1.44) | 0.29             | 0.52                | 1.34 (1.19 - 1.52) | <0.0001          | <0.0001             |
| IGFBP-2              | 1.53 (1.10 - 2.11) | 0.010            | 0.046               | 1.34 (0.94 - 1.93) | 0.10             | 0.30                | 1.51 (1.26 - 1.82) | <0.0001          | 0.0001              |
| IGFBP-7              | 1.38 (0.86 - 2.21) | 0.17             | 0.33                | 3.25 (1.54 - 6.86) | 0.001            | 0.035               | 1.45 (1.17 - 1.79) | 0.0006           | 0.003               |
| IgG Fc receptor II-b | 1.07 (0.82 - 1.38) | 0.62             | 0.73                | 1.05 (0.80 - 1.39) | 0.71             | 0.86                | 1.19 (0.98 - 1.45) | 0.071            | 0.12                |
| IL10                 | 1.38 (0.95 - 2.00) | 0.093            | 0.21                | 1.43 (0.94 - 2.16) | 0.092            | 0.29                | 1.11 (0.95 - 1.30) | 0.17             | 0.24                |
| IL-10RA              | 0.72 (0.52 - 1.01) | 0.055            | 0.14                | 0.93 (0.70 - 1.24) | 0.63             | 0.82                | 1.09 (0.78 - 1.51) | 0.62             | 0.69                |
| IL-10RB              | 1.92 (1.00 - 3.67) | 0.048            | 0.13                | 1.60 (0.72 - 3.52) | 0.24             | 0.47                | 1.19 (0.91 - 1.55) | 0.20             | 0.27                |
| IL-12B               | 1.20 (0.90 - 1.60) | 0.21             | 0.38                | 1.26 (0.88 - 1.81) | 0.20             | 0.42                | 1.20 (1.02 - 1.41) | 0.024            | 0.052               |
| IL-15RA              | 1.72 (0.33 - 8.95) | 0.52             | 0.65                | 2.45 (0.88 - 6.83) | 0.086            | 0.28                | 1.59 (1.17 - 2.16) | 0.003            | 0.010               |
| IL16                 | 1.46 (0.97 - 2.20) | 0.071            | 0.17                | 0.92 (0.59 - 1.45) | 0.72             | 0.87                | 1.36 (1.13 - 1.63) | 0.001            | 0.005               |
| IL-17A               | 1.10 (0.79 - 1.54) | 0.56             | 0.68                | 0.98 (0.69 - 1.41) | 0.93             | 0.96                | 1.09 (0.88 - 1.35) | 0.41             | 0.48                |
| IL-17C               | 1.36 (1.01 - 1.84) | 0.042            | 0.12                | 0.94 (0.65 - 1.37) | 0.76             | 0.89                | 1.19 (0.98 - 1.44) | 0.083            | 0.13                |
| IL-17D               | 1.13 (0.57 - 2.25) | 0.71             | 0.79                | 0.55 (0.24 - 1.22) | 0.14             | 0.35                | 1.31 (1.00 - 1.72) | 0.052            | 0.095               |
| IL-17RA              | 0.89 (0.62 - 1.28) | 0.54             | 0.66                | 1.34 (0.86 - 2.09) | 0.20             | 0.42                | 1.06 (0.89 - 1.25) | 0.51             | 0.58                |
| IL18                 | 1.25 (0.87 - 1.81) | 0.23             | 0.40                | 1.30 (0.88 - 1.92) | 0.18             | 0.40                | 1.20 (1.05 - 1.37) | 0.006            | 0.018               |
| IL-18BP              | 1.26 (0.74 - 2.16) | 0.39             | 0.54                | 1.67 (0.85 - 3.26) | 0.13             | 0.35                | 1.36 (1.09 - 1.69) | 0.005            | 0.017               |
| IL-18R1              | 0.89 (0.54 - 1.46) | 0.64             | 0.74                | 1.58 (0.91 - 2.74) | 0.10             | 0.30                | 1.10 (0.86 - 1.40) | 0.45             | 0.52                |
| IL-1ra               | 1.31 (0.93 - 1.83) | 0.11             | 0.24                | 1.09 (0.76 - 1.54) | 0.64             | 0.82                | 1.23 (1.08 - 1.41) | 0.001            | 0.006               |
| IL1RL2               | 0.60 (0.37 - 0.98) | 0.043            | 0.12                | 0.82 (0.49 - 1.38) | 0.45             | 0.70                | 1.06 (0.86 - 1.33) | 0.57             | 0.63                |
| IL-1RT1              | 1.44 (0.82 - 2.53) | 0.19             | 0.37                | 2.13 (0.99 - 4.57) | 0.053            | 0.22                | 1.23 (0.95 - 1.58) | 0.11             | 0.17                |
| IL-1RT2              | 0.86 (0.51 - 1.46) | 0.57             | 0.69                | 1.75 (0.90 - 3.40) | 0.096            | 0.30                | 1.03 (0.83 - 1.27) | 0.81             | 0.84                |
| IL-27                | 2.14 (1.29 - 3.53) | 0.003            | 0.020               | 1.45 (0.87 - 2.43) | 0.15             | 0.36                | 1.63 (1.25 - 2.13) | 0.0003           | 0.001               |
| IL2-RA               | 1.74 (1.14 - 2.65) | 0.010            | 0.046               | 1.63 (1.00 - 2.65) | 0.049            | 0.22                | 1.47 (1.20 - 1.80) | 0.0002           | 0.001               |
| IL-4RA               | 2.31 (1.32 - 4.04) | 0.003            | 0.020               | 1.58 (0.74 - 3.35) | 0.23             | 0.46                | 1.40 (1.13 - 1.73) | 0.001            | 0.007               |
| IL6                  | 1.42 (1.13 - 1.79) | 0.003            | 0.020               | 1.40 (1.08 - 1.82) | 0.011            | 0.095               | 1.24 (1.10 - 1.40) | 0.0005           | 0.002               |
| IL-6RA               | 1.32 (0.79 - 2.19) | 0.29             | 0.44                | 1.27 (0.71 - 2.27) | 0.41             | 0.67                | 1.42 (1.12 - 1.80) | 0.003            | 0.011               |
| IL7                  | 0.65 (0.46 - 0.94) | 0.020            | 0.067               | 0.96 (0.64 - 1.44) | 0.84             | 0.92                | 1.08 (0.94 - 1.25) | 0.28             | 0.35                |
| IL8                  | 0.96 (0.74 - 1.24) | 0.74             | 0.82                | 1.78 (1.15 - 2.76) | 0.009            | 0.095               | 1.15 (1.01 - 1.31) | 0.029            | 0.059               |

| Biomarker      | ARIC               |                  |                     | FRAMINGHAM         |                  |                     | HOMAGE             |                  |                     |
|----------------|--------------------|------------------|---------------------|--------------------|------------------|---------------------|--------------------|------------------|---------------------|
|                | OR (CI 95%)        | Original p-value | BH adjusted p-value | OR (CI 95%)        | Original p-value | BH adjusted p-value | OR (CI 95%)        | Original p-value | BH adjusted p-value |
| ITGB1BP2       | 0.71 (0.59 - 0.86) | 0.0002           | 0.004               | 1.14 (0.82 - 1.60) | 0.43             | 0.68                | 1.05 (0.98 - 1.13) | 0.15             | 0.22                |
| ITGB2          | 1.02 (0.59 - 1.76) | 0.93             | 0.95                | 1.55 (0.82 - 2.95) | 0.17             | 0.40                | 1.19 (0.97 - 1.47) | 0.096            | 0.15                |
| JAM-A          | 0.52 (0.34 - 0.78) | 0.001            | 0.014               | 1.92 (1.16 - 3.20) | 0.011            | 0.095               | 1.21 (1.05 - 1.38) | 0.007            | 0.020               |
| KIM1           | 1.11 (0.88 - 1.40) | 0.39             | 0.54                | 1.56 (1.13 - 2.15) | 0.006            | 0.081               | 1.28 (1.12 - 1.48) | 0.0004           | 0.002               |
| KLK6           | 1.00 (0.60 - 1.67) | 0.99             | 0.99                | 0.56 (0.27 - 1.14) | 0.10             | 0.30                | 0.92 (0.75 - 1.14) | 0.45             | 0.53                |
| LAP TGF-beta-1 | 0.83 (0.46 - 1.48) | 0.52             | 0.65                | 2.11 (1.04 - 4.28) | 0.037            | 0.20                | 1.33 (1.09 - 1.63) | 0.005            | 0.016               |
| LDL receptor   | 0.76 (0.50 - 1.13) | 0.17             | 0.33                | 0.88 (0.55 - 1.42) | 0.60             | 0.81                | 0.88 (0.74 - 1.04) | 0.13             | 0.19                |
| LEP            | 0.76 (0.59 - 0.99) | 0.039            | 0.11                | 0.92 (0.67 - 1.27) | 0.62             | 0.82                | 1.02 (0.89 - 1.17) | 0.75             | 0.78                |
| LIF-R          | 2.04 (0.91 - 4.57) | 0.082            | 0.19                | 1.80 (0.71 - 4.56) | 0.21             | 0.44                | 1.21 (0.91 - 1.60) | 0.19             | 0.26                |
| LOX-1          | 2.19 (1.34 - 3.59) | 0.001            | 0.014               | 1.61 (0.98 - 2.63) | 0.057            | 0.22                | 1.39 (1.18 - 1.65) | 0.0001           | 0.0009              |
| LPL            | 0.76 (0.45 - 1.28) | 0.29             | 0.44                | 0.57 (0.32 - 1.02) | 0.060            | 0.22                | 1.02 (0.81 - 1.27) | 0.89             | 0.90                |
| LTBR           | 1.66 (0.93 - 2.94) | 0.084            | 0.19                | 1.66 (0.79 - 3.48) | 0.18             | 0.40                | 1.45 (1.14 - 1.85) | 0.002            | 0.008               |
| MARCO          | 1.04 (0.44 - 2.46) | 0.92             | 0.94                | 1.05 (0.38 - 2.86) | 0.93             | 0.96                | 1.02 (0.84 - 1.25) | 0.82             | 0.84                |
| MB             | 0.65 (0.46 - 0.91) | 0.012            | 0.049               | 1.62 (1.02 - 2.57) | 0.041            | 0.20                | 0.94 (0.79 - 1.12) | 0.48             | 0.55                |
| MCP-1          | 1.03 (0.59 - 1.79) | 0.91             | 0.94                | 1.47 (0.77 - 2.82) | 0.24             | 0.47                | 1.20 (1.03 - 1.40) | 0.019            | 0.043               |
| MCP-2          | 0.69 (0.50 - 0.96) | 0.029            | 0.093               | 1.47 (1.00 - 2.15) | 0.047            | 0.21                | 1.20 (1.02 - 1.41) | 0.030            | 0.059               |
| MCP-3          | 0.94 (0.70 - 1.26) | 0.67             | 0.77                | 1.51 (1.08 - 2.13) | 0.017            | 0.13                | 1.36 (1.13 - 1.64) | 0.0009           | 0.004               |
| MCP-4          | 0.65 (0.48 - 0.88) | 0.006            | 0.028               | 1.21 (0.82 - 1.78) | 0.32             | 0.57                | 1.02 (0.87 - 1.20) | 0.76             | 0.79                |
| MEPE           | 0.62 (0.39 - 0.99) | 0.044            | 0.12                | 0.76 (0.40 - 1.44) | 0.39             | 0.65                | 0.88 (0.72 - 1.08) | 0.23             | 0.30                |
| MERTK          | 1.10 (0.68 - 1.78) | 0.70             | 0.79                | 1.04 (0.60 - 1.83) | 0.88             | 0.92                | 1.44 (1.11 - 1.86) | 0.006            | 0.017               |
| MMP-1          | 0.97 (0.80 - 1.19) | 0.78             | 0.84                | 1.13 (0.88 - 1.46) | 0.33             | 0.58                | 1.09 (0.99 - 1.19) | 0.076            | 0.13                |
| MMP-10         | 1.21 (0.85 - 1.72) | 0.29             | 0.44                | 1.11 (0.74 - 1.66) | 0.61             | 0.81                | 1.04 (0.88 - 1.23) | 0.63             | 0.69                |
| MMP12          | 1.79 (1.31 - 2.45) | 0.0002           | 0.004               | 1.47 (1.03 - 2.11) | 0.035            | 0.20                | 1.36 (1.14 - 1.61) | 0.0005           | 0.002               |
| MMP-2          | 2.09 (1.17 - 3.75) | 0.013            | 0.051               | 1.27 (0.59 - 2.71) | 0.53             | 0.75                | 1.56 (1.23 - 1.97) | 0.0002           | 0.001               |
| MMP-3          | 0.83 (0.59 - 1.16) | 0.27             | 0.43                | 0.87 (0.57 - 1.35) | 0.54             | 0.75                | 1.26 (1.07 - 1.49) | 0.005            | 0.016               |
| MMP7           | 1.52 (0.81 - 2.87) | 0.19             | 0.35                | 1.83 (1.07 - 3.13) | 0.026            | 0.17                | 1.10 (0.98 - 1.22) | 0.094            | 0.15                |
| MMP-9          | 1.10 (0.82 - 1.48) | 0.53             | 0.66                | 1.97 (1.36 - 2.84) | 0.0003           | 0.010               | 1.16 (1.04 - 1.31) | 0.010            | 0.026               |
| MPO            | 1.60 (0.93 - 2.76) | 0.090            | 0.20                | 2.13 (1.19 - 3.84) | 0.011            | 0.095               | 1.28 (1.05 - 1.55) | 0.013            | 0.032               |
| NEMO           | 0.70 (0.56 - 0.89) | 0.003            | 0.020               | 1.02 (0.78 - 1.35) | 0.86             | 0.92                | 1.11 (1.01 - 1.22) | 0.034            | 0.066               |
| Notch 3        | 1.03 (0.63 - 1.67) | 0.91             | 0.94                | 1.63 (0.83 - 3.22) | 0.15             | 0.36                | 1.22 (0.97 - 1.54) | 0.083            | 0.13                |
| NT-3           | 0.80 (0.51 - 1.25) | 0.32             | 0.46                | 0.78 (0.41 - 1.49) | 0.45             | 0.70                | 1.13 (0.93 - 1.37) | 0.21             | 0.28                |
| NT-proBNP      | 1.95 (1.61 - 2.36) | <0.0001          | <0.0001             | 1.79 (1.41 - 2.26) | <0.0001          | 0.0003              | 1.90 (1.65 - 2.18) | <0.0001          | <0.0001             |
| OPG            | 1.30 (0.77 - 2.18) | 0.32             | 0.46                | 2.17 (1.12 - 4.20) | 0.021            | 0.15                | 1.72 (1.32 - 2.25) | <0.0001          | 0.0005              |
| OPN            | 1.21 (0.85 - 1.72) | 0.29             | 0.44                | 1.23 (0.79 - 1.91) | 0.35             | 0.59                | 1.57 (1.28 - 1.92) | <0.0001          | 0.0001              |

| Biomarker      | ARIC                |                  |                     | FRAMINGHAM          |                  |                     | HOMAGE             |                  |                     |
|----------------|---------------------|------------------|---------------------|---------------------|------------------|---------------------|--------------------|------------------|---------------------|
|                | OR (CI 95%)         | Original p-value | BH adjusted p-value | OR (CI 95%)         | Original p-value | BH adjusted p-value | OR (CI 95%)        | Original p-value | BH adjusted p-value |
| OSM            | 1.16 (0.91 - 1.49)  | 0.24             | 0.40                | 1.86 (1.36 - 2.55)  | 0.0001           | 0.005               | 1.17 (1.03 - 1.32) | 0.015            | 0.036               |
| PAI            | 0.70 (0.55 - 0.90)  | 0.004            | 0.024               | 1.14 (0.88 - 1.46)  | 0.31             | 0.56                | 1.04 (0.92 - 1.18) | 0.53             | 0.60                |
| PAPPA          | 0.99 (0.70 - 1.39)  | 0.94             | 0.95                | 1.07 (0.74 - 1.55)  | 0.72             | 0.87                | 1.27 (1.06 - 1.54) | 0.011            | 0.029               |
| PAR-1          | 0.52 (0.29 - 0.94)  | 0.031            | 0.099               | 1.20 (0.62 - 2.34)  | 0.58             | 0.80                | 1.54 (1.21 - 1.97) | 0.0005           | 0.002               |
| PARP-1         | 0.85 (0.59 - 1.21)  | 0.35             | 0.50                | 1.15 (0.73 - 1.81)  | 0.55             | 0.76                | 1.15 (1.03 - 1.28) | 0.011            | 0.029               |
| PCSK9          | 0.53 (0.29 - 0.96)  | 0.035            | 0.11                | 0.93 (0.47 - 1.82)  | 0.83             | 0.92                | 1.18 (0.94 - 1.48) | 0.15             | 0.21                |
| PDGF subunit A | 0.57 (0.43 - 0.76)  | 0.0001           | 0.002               | 1.28 (0.92 - 1.79)  | 0.13             | 0.35                | 1.09 (0.97 - 1.22) | 0.14             | 0.21                |
| PDGF subunit B | 0.68 (0.57 - 0.82)  | <0.0001          | 0.002               | 1.05 (0.87 - 1.27)  | 0.58             | 0.80                | 1.12 (1.01 - 1.24) | 0.032            | 0.062               |
| PD-L1          | 1.43 (0.85 - 2.38)  | 0.17             | 0.33                | 1.61 (0.96 - 2.69)  | 0.071            | 0.25                | 1.24 (1.00 - 1.55) | 0.054            | 0.098               |
| PD-L2          | 1.41 (0.80 - 2.47)  | 0.23             | 0.40                | 1.10 (0.56 - 2.16)  | 0.78             | 0.89                | 1.66 (1.24 - 2.22) | 0.0007           | 0.003               |
| PECAM-1        | 0.49 (0.28 - 0.87)  | 0.014            | 0.052               | 1.82 (0.89 - 3.73)  | 0.10             | 0.30                | 1.25 (1.02 - 1.54) | 0.030            | 0.059               |
| PGF            | 2.99 (1.56 - 5.73)  | 0.0009           | 0.009               | 1.73 (0.83 - 3.58)  | 0.14             | 0.35                | 1.61 (1.24 - 2.09) | 0.0003           | 0.002               |
| PGLYRP1        | 1.15 (0.77 - 1.71)  | 0.48             | 0.62                | 1.10 (0.67 - 1.81)  | 0.70             | 0.86                | 1.35 (1.12 - 1.63) | 0.001            | 0.005               |
| PI3            | 1.32 (0.94 - 1.84)  | 0.10             | 0.23                | 0.92 (0.65 - 1.32)  | 0.65             | 0.82                | 1.09 (0.94 - 1.26) | 0.25             | 0.32                |
| PIgR           | 9.84 (2.80 - 34.55) | 0.0003           | 0.005               | 0.24 (0.04 - 1.41)  | 0.11             | 0.31                | 1.65 (1.09 - 2.49) | 0.018            | 0.043               |
| PLC            | 1.78 (0.91 - 3.46)  | 0.090            | 0.20                | 5.48 (1.83 - 16.42) | 0.002            | 0.039               | 1.61 (1.21 - 2.13) | 0.001            | 0.004               |
| PON3           | 0.83 (0.60 - 1.14)  | 0.24             | 0.40                | 0.71 (0.47 - 1.06)  | 0.094            | 0.29                | 0.78 (0.66 - 0.92) | 0.003            | 0.010               |
| PRELP          | 4.39 (1.43 - 13.50) | 0.009            | 0.043               | 5.03 (1.32 - 19.19) | 0.018            | 0.13                | 1.66 (1.10 - 2.51) | 0.016            | 0.038               |
| PRSS27         | 0.92 (0.62 - 1.39)  | 0.70             | 0.79                | 0.50 (0.30 - 0.84)  | 0.009            | 0.095               | 1.04 (0.83 - 1.29) | 0.75             | 0.78                |
| PRSS8          | 1.69 (0.93 - 3.05)  | 0.083            | 0.19                | 0.85 (0.42 - 1.71)  | 0.64             | 0.82                | 1.21 (0.99 - 1.48) | 0.068            | 0.12                |
| PRTN3          | 1.43 (0.94 - 2.17)  | 0.095            | 0.21                | 1.88 (1.15 - 3.06)  | 0.011            | 0.095               | 1.28 (1.09 - 1.52) | 0.003            | 0.010               |
| PSGL-1         | 1.35 (0.83 - 2.18)  | 0.22             | 0.39                | 1.14 (0.49 - 2.64)  | 0.76             | 0.89                | 1.27 (1.00 - 1.60) | 0.047            | 0.089               |
| PSP-D          | 1.32 (1.04 - 1.68)  | 0.021            | 0.068               | 1.27 (0.94 - 1.71)  | 0.11             | 0.31                | 1.32 (1.14 - 1.53) | 0.0002           | 0.001               |
| PTX3           | 1.66 (1.15 - 2.39)  | 0.006            | 0.028               | 1.85 (1.03 - 3.31)  | 0.037            | 0.20                | 1.28 (1.07 - 1.53) | 0.008            | 0.022               |
| RAGE           | 2.01 (1.25 - 3.21)  | 0.003            | 0.021               | 0.76 (0.45 - 1.27)  | 0.29             | 0.52                | 1.18 (0.93 - 1.50) | 0.17             | 0.24                |
| RARRES2        | 0.69 (0.34 - 1.40)  | 0.30             | 0.45                | 2.33 (0.97 - 5.60)  | 0.058            | 0.22                | 1.92 (1.37 - 2.67) | 0.0001           | 0.0009              |
| REN            | 0.87 (0.69 - 1.10)  | 0.24             | 0.40                | 1.34 (1.00 - 1.80)  | 0.051            | 0.22                | 1.29 (1.13 - 1.47) | 0.0001           | 0.0009              |
| RETN           | 1.03 (0.70 - 1.50)  | 0.89             | 0.93                | 1.51 (0.88 - 2.57)  | 0.13             | 0.34                | 1.38 (1.14 - 1.68) | 0.0009           | 0.004               |
| SCF            | 0.52 (0.31 - 0.89)  | 0.016            | 0.060               | 0.58 (0.34 - 0.98)  | 0.042            | 0.20                | 1.02 (0.80 - 1.31) | 0.84             | 0.86                |
| SCGB3A2        | 0.92 (0.70 - 1.21)  | 0.56             | 0.68                | 1.27 (0.96 - 1.68)  | 0.097            | 0.30                | 1.08 (0.96 - 1.21) | 0.20             | 0.28                |
| SELE           | 0.95 (0.67 - 1.35)  | 0.77             | 0.84                | 1.31 (0.87 - 1.98)  | 0.19             | 0.41                | 1.21 (0.98 - 1.49) | 0.082            | 0.13                |
| SELP           | 0.52 (0.34 - 0.78)  | 0.001            | 0.014               | 1.81 (1.08 - 3.03)  | 0.023            | 0.16                | 1.20 (1.02 - 1.41) | 0.027            | 0.057               |
| SERPINA12      | 0.93 (0.81 - 1.06)  | 0.27             | 0.43                | 1.24 (0.99 - 1.57)  | 0.064            | 0.23                | 1.02 (0.94 - 1.11) | 0.62             | 0.69                |
| SHPS-1         | 1.27 (0.80 - 2.01)  | 0.30             | 0.45                | 1.21 (0.69 - 2.10)  | 0.50             | 0.73                | 1.14 (0.92 - 1.40) | 0.22             | 0.29                |

| Biomarker | ARIC                |                  |                     | FRAMINGHAM          |                  |                     | HOMAGE             |                  |                     |
|-----------|---------------------|------------------|---------------------|---------------------|------------------|---------------------|--------------------|------------------|---------------------|
|           | OR (CI 95%)         | Original p-value | BH adjusted p-value | OR (CI 95%)         | Original p-value | BH adjusted p-value | OR (CI 95%)        | Original p-value | BH adjusted p-value |
| SIRT2     | 0.71 (0.58 - 0.86)  | 0.0004           | 0.006               | 1.12 (0.81 - 1.56)  | 0.48             | 0.71                | 1.08 (1.00 - 1.17) | 0.046            | 0.087               |
| SLAMF1    | 1.35 (0.99 - 1.84)  | 0.055            | 0.14                | 0.97 (0.62 - 1.52)  | 0.90             | 0.94                | 1.31 (1.10 - 1.55) | 0.001            | 0.007               |
| SLAMF7    | 1.01 (0.77 - 1.33)  | 0.94             | 0.95                | 0.95 (0.68 - 1.33)  | 0.76             | 0.89                | 1.58 (1.30 - 1.92) | <0.0001          | <0.0001             |
| SOD2      | 1.18 (0.50 - 2.78)  | 0.71             | 0.79                | 1.08 (0.10 - 11.22) | 0.94             | 0.96                | 1.89 (1.23 - 2.90) | 0.003            | 0.011               |
| SORT1     | 1.57 (0.70 - 3.52)  | 0.27             | 0.43                | 0.75 (0.31 - 1.82)  | 0.52             | 0.74                | 1.92 (1.35 - 2.72) | 0.0002           | 0.001               |
| SPON1     | 3.19 (1.52 - 6.67)  | 0.002            | 0.016               | 2.88 (1.13 - 7.35)  | 0.026            | 0.17                | 1.83 (1.38 - 2.43) | <0.0001          | 0.0003              |
| SPON2     | 8.35 (2.23 - 31.25) | 0.001            | 0.013               | 0.80 (0.20 - 3.22)  | 0.75             | 0.89                | 2.09 (1.39 - 3.13) | 0.0003           | 0.001               |
| SRC       | 0.56 (0.42 - 0.76)  | 0.0001           | 0.002               | 0.98 (0.77 - 1.26)  | 0.90             | 0.94                | 1.11 (0.99 - 1.24) | 0.083            | 0.13                |
| ST1A1     | 0.71 (0.58 - 0.88)  | 0.001            | 0.012               | 1.20 (0.86 - 1.69)  | 0.28             | 0.52                | 1.07 (0.98 - 1.17) | 0.13             | 0.19                |
| ST2       | 1.24 (0.84 - 1.84)  | 0.27             | 0.43                | 2.08 (1.25 - 3.44)  | 0.004            | 0.064               | 1.36 (1.13 - 1.65) | 0.001            | 0.005               |
| STAMPB    | 0.65 (0.49 - 0.87)  | 0.003            | 0.020               | 1.21 (0.78 - 1.86)  | 0.39             | 0.64                | 1.07 (0.97 - 1.18) | 0.17             | 0.24                |
| STK4      | 0.69 (0.56 - 0.85)  | 0.0005           | 0.006               | 1.04 (0.81 - 1.32)  | 0.77             | 0.89                | 1.08 (0.99 - 1.18) | 0.065            | 0.11                |
| TF        | 0.80 (0.44 - 1.47)  | 0.47             | 0.61                | 0.44 (0.21 - 0.94)  | 0.033            | 0.20                | 1.26 (0.97 - 1.64) | 0.084            | 0.13                |
| TFF3      | 2.29 (1.41 - 3.71)  | 0.0007           | 0.008               | 1.31 (0.93 - 1.86)  | 0.12             | 0.33                | 1.45 (1.23 - 1.71) | <0.0001          | 0.0001              |
| TFPI      | 0.68 (0.36 - 1.27)  | 0.22             | 0.39                | 1.15 (0.55 - 2.41)  | 0.70             | 0.86                | 1.05 (0.81 - 1.37) | 0.70             | 0.75                |
| TGF-alpha | 3.28 (1.53 - 7.03)  | 0.002            | 0.016               | 4.84 (2.09 - 11.19) | 0.0002           | 0.009               | 1.41 (1.15 - 1.73) | 0.0008           | 0.003               |
| TGM2      | 0.78 (0.57 - 1.09)  | 0.14             | 0.29                | 1.58 (1.11 - 2.24)  | 0.010            | 0.095               | 1.34 (1.17 - 1.54) | <0.0001          | 0.0003              |
| THBS2     | 6.18 (2.52 - 15.17) | <0.0001          | 0.002               | 6.09 (2.01 - 18.46) | 0.001            | 0.028               | 1.62 (1.15 - 2.29) | 0.005            | 0.017               |
| THPO      | 0.47 (0.25 - 0.88)  | 0.017            | 0.062               | 0.67 (0.32 - 1.41)  | 0.29             | 0.52                | 1.16 (0.92 - 1.45) | 0.20             | 0.27                |
| TIE2      | 1.27 (0.55 - 2.98)  | 0.57             | 0.69                | 1.26 (0.53 - 3.02)  | 0.59             | 0.81                | 1.16 (0.89 - 1.52) | 0.26             | 0.33                |
| TIMP4     | 0.98 (0.64 - 1.51)  | 0.94             | 0.95                | 1.27 (0.76 - 2.13)  | 0.35             | 0.59                | 1.34 (1.10 - 1.63) | 0.003            | 0.010               |
| TLT-2     | 1.13 (0.77 - 1.66)  | 0.53             | 0.66                | 0.89 (0.54 - 1.47)  | 0.64             | 0.82                | 1.20 (0.99 - 1.47) | 0.069            | 0.12                |
| TM        | 1.52 (0.80 - 2.89)  | 0.20             | 0.37                | 0.64 (0.34 - 1.23)  | 0.18             | 0.40                | 1.34 (1.02 - 1.77) | 0.035            | 0.067               |
| TNFB      | 1.08 (0.70 - 1.67)  | 0.71             | 0.79                | 1.35 (0.85 - 2.14)  | 0.20             | 0.43                | 0.94 (0.76 - 1.15) | 0.53             | 0.60                |
| TNF-R1    | 1.71 (1.02 - 2.86)  | 0.040            | 0.11                | 1.92 (0.97 - 3.79)  | 0.059            | 0.22                | 1.57 (1.24 - 1.99) | 0.0002           | 0.001               |
| TNF-R2    | 1.58 (0.99 - 2.52)  | 0.054            | 0.14                | 1.84 (1.06 - 3.23)  | 0.031            | 0.19                | 1.51 (1.22 - 1.87) | 0.0001           | 0.0009              |
| TNFRSF10A | 1.90 (1.12 - 3.22)  | 0.018            | 0.062               | 1.96 (1.02 - 3.76)  | 0.043            | 0.20                | 1.94 (1.48 - 2.54) | <0.0001          | <0.0001             |
| TNFRSF10C | 1.09 (0.77 - 1.54)  | 0.63             | 0.74                | 1.45 (0.92 - 2.31)  | 0.11             | 0.31                | 1.13 (0.93 - 1.38) | 0.21             | 0.28                |
| TNFRSF11A | 1.81 (1.12 - 2.93)  | 0.016            | 0.058               | 1.34 (0.79 - 2.29)  | 0.27             | 0.51                | 1.57 (1.27 - 1.93) | <0.0001          | 0.0003              |
| TNFRSF13B | 1.14 (0.83 - 1.56)  | 0.42             | 0.57                | 1.01 (0.69 - 1.49)  | 0.93             | 0.96                | 1.75 (1.41 - 2.18) | <0.0001          | <0.0001             |
| TNFRSF14  | 1.33 (0.77 - 2.27)  | 0.30             | 0.45                | 2.03 (1.02 - 4.02)  | 0.043            | 0.20                | 1.49 (1.19 - 1.87) | 0.0005           | 0.002               |
| TNFRSF9   | 1.41 (1.02 - 1.95)  | 0.038            | 0.11                | 1.38 (0.89 - 2.14)  | 0.15             | 0.36                | 1.27 (1.07 - 1.51) | 0.005            | 0.017               |
| TNFSF13B  | 1.39 (0.89 - 2.15)  | 0.14             | 0.29                | 2.06 (1.08 - 3.93)  | 0.029            | 0.18                | 1.20 (0.94 - 1.53) | 0.13             | 0.20                |
| TNFSF14   | 0.69 (0.44 - 1.08)  | 0.10             | 0.22                | 2.31 (1.33 - 4.01)  | 0.002            | 0.043               | 1.21 (1.04 - 1.40) | 0.013            | 0.032               |

| Biomarker | ARIC               |                  |                     | FRAMINGHAM         |                  |                     | HOMAGE             |                  |                     |
|-----------|--------------------|------------------|---------------------|--------------------|------------------|---------------------|--------------------|------------------|---------------------|
|           | OR (CI 95%)        | Original p-value | BH adjusted p-value | OR (CI 95%)        | Original p-value | BH adjusted p-value | OR (CI 95%)        | Original p-value | BH adjusted p-value |
| t-PA      | 0.97 (0.70 - 1.34) | 0.84             | 0.89                | 1.64 (0.96 - 2.81) | 0.070            | 0.25                | 1.05 (0.91 - 1.23) | 0.49             | 0.56                |
| TR        | 1.20 (0.88 - 1.64) | 0.23             | 0.40                | 1.41 (0.93 - 2.13) | 0.10             | 0.30                | 1.23 (1.05 - 1.43) | 0.008            | 0.022               |
| TRAIL     | 0.42 (0.20 - 0.86) | 0.018            | 0.062               | 1.51 (0.71 - 3.21) | 0.28             | 0.52                | 0.79 (0.60 - 1.04) | 0.086            | 0.14                |
| TRAIL-R2  | 4.52 (2.44 - 8.40) | <0.0001          | 0.0001              | 1.62 (0.84 - 3.13) | 0.15             | 0.36                | 2.43 (1.85 - 3.19) | <0.0001          | <0.0001             |
| TRANCE    | 1.03 (0.72 - 1.49) | 0.85             | 0.90                | 1.09 (0.75 - 1.59) | 0.65             | 0.82                | 0.84 (0.70 - 1.00) | 0.051            | 0.094               |
| TR-AP     | 0.45 (0.26 - 0.77) | 0.003            | 0.021               | 0.91 (0.47 - 1.77) | 0.78             | 0.89                | 0.90 (0.72 - 1.12) | 0.34             | 0.42                |
| TWEAK     | 0.35 (0.17 - 0.71) | 0.003            | 0.021               | 0.32 (0.14 - 0.71) | 0.005            | 0.064               | 0.60 (0.48 - 0.77) | <0.0001          | 0.0003              |
| uPA       | 1.15 (0.70 - 1.88) | 0.58             | 0.70                | 1.09 (0.58 - 2.07) | 0.78             | 0.89                | 1.18 (0.93 - 1.49) | 0.17             | 0.24                |
| U-PAR     | 2.29 (1.28 - 4.08) | 0.005            | 0.025               | 3.83 (1.78 - 8.24) | 0.0005           | 0.014               | 1.82 (1.44 - 2.31) | <0.0001          | <0.0001             |
| VEGFA     | 1.68 (0.85 - 3.30) | 0.13             | 0.27                | 3.04 (1.39 - 6.63) | 0.005            | 0.064               | 1.62 (1.28 - 2.06) | <0.0001          | 0.0006              |
| VEGFD     | 2.02 (1.23 - 3.29) | 0.005            | 0.025               | 1.01 (0.58 - 1.75) | 0.96             | 0.97                | 1.80 (1.38 - 2.34) | <0.0001          | 0.0001              |
| VSIG2     | 1.18 (0.84 - 1.64) | 0.33             | 0.48                | 1.03 (0.64 - 1.66) | 0.90             | 0.94                | 1.31 (1.08 - 1.60) | 0.005            | 0.017               |
| vWF       | 0.90 (0.67 - 1.20) | 0.47             | 0.60                | 1.43 (0.93 - 2.19) | 0.099            | 0.30                | 1.16 (1.05 - 1.28) | 0.004            | 0.013               |
| XCL1      | 1.15 (0.82 - 1.62) | 0.41             | 0.56                | 1.53 (1.02 - 2.30) | 0.040            | 0.20                | 1.20 (1.02 - 1.43) | 0.032            | 0.062               |

Protein names are available in Supplemental Table 1.

**Supplemental Table 3: Odds ratios (OR) and 95% confidence intervals (CI) for the biomarkers associated (p<0.05) with incident heart failure on mono-biomarker analysis after adjusting for matching and clinical variables including black race and correction for multiple comparisons in ARIC cohort**

| Biomarker          | ARIC                                        |                        |                                                |                        |
|--------------------|---------------------------------------------|------------------------|------------------------------------------------|------------------------|
|                    | With black race<br>among clinical variables |                        | Without black race<br>among clinical variables |                        |
|                    | OR (CI 95%)                                 | BH adjusted<br>p-value | OR (CI 95%)                                    | BH adjusted<br>p-value |
| NT-proBNP          | 1.89 (1.56 - 2.29)                          | <0.0001                | 1.95 (1.61 - 2.36)                             | <0.0001                |
| BNP                | 1.62 (1.38 - 1.91)                          | <0.0001                | 1.65 (1.40 - 1.93)                             | <0.0001                |
| TRAIL-R2           | 3.87 (2.06 - 7.26)                          | 0.002                  | 4.52 (2.44 - 8.40)                             | 0.0001                 |
| PDGF subunit B     | 0.70 (0.58 - 0.84)                          | 0.009                  | 0.68 (0.57 - 0.82)                             | 0.002                  |
| MMP12              | 1.82 (1.32 - 2.50)                          | 0.009                  | 1.79 (1.31 - 2.45)                             | 0.004                  |
| CASP-3             | 0.67 (0.55 - 0.83)                          | 0.009                  | 0.66 (0.53 - 0.81)                             | 0.002                  |
| HB-EGF             | 0.51 (0.35 - 0.73)                          | 0.010                  | 0.51 (0.35 - 0.73)                             | 0.004                  |
| PDGF subunit A     | 0.59 (0.44 - 0.79)                          | 0.010                  | 0.57 (0.43 - 0.76)                             | 0.002                  |
| SPON1              | 4.01 (1.87 - 8.63)                          | 0.010                  | 3.19 (1.52 - 6.67)                             | 0.016                  |
| HSP 27             | 0.27 (0.13 - 0.56)                          | 0.010                  | 0.27 (0.13 - 0.55)                             | 0.004                  |
| JAM-A              | 0.47 (0.30 - 0.72)                          | 0.011                  | 0.52 (0.34 - 0.78)                             | 0.014                  |
| ADM                | 2.95 (1.60 - 5.44)                          | 0.011                  | 3.59 (2.01 - 6.43)                             | 0.0008                 |
| THBS2              | 4.83 (1.93 - 12.10)                         | 0.013                  | 6.18 (2.52 - 15.17)                            | 0.002                  |
| CXCL5              | 0.78 (0.67 - 0.90)                          | 0.013                  | 0.74 (0.64 - 0.85)                             | 0.0008                 |
| SRC                | 0.60 (0.45 - 0.81)                          | 0.013                  | 0.56 (0.42 - 0.76)                             | 0.002                  |
| AXIN1              | 0.68 (0.54 - 0.85)                          | 0.013                  | 0.67 (0.53 - 0.84)                             | 0.006                  |
| PAI                | 0.65 (0.50 - 0.84)                          | 0.015                  | 0.70 (0.55 - 0.90)                             | 0.024                  |
| CD84               | 0.46 (0.29 - 0.74)                          | 0.016                  | 0.52 (0.33 - 0.82)                             | 0.024                  |
| MEPE               | 0.44 (0.26 - 0.73)                          | 0.018                  | 0.62 (0.39 - 0.99)                             | 0.12                   |
| CCL19              | 1.47 (1.16 - 1.87)                          | 0.018                  | 1.44 (1.13 - 1.82)                             | 0.018                  |
| IL6 (CVD II panel) | 1.45 (1.15 - 1.83)                          | 0.019                  | 1.42 (1.13 - 1.79)                             | 0.020                  |
| BOC                | 4.15 (1.69 - 10.19)                         | 0.019                  | 2.80 (1.19 - 6.60)                             | 0.062                  |
| CD40-L             | 0.69 (0.54 - 0.87)                          | 0.019                  | 0.65 (0.52 - 0.82)                             | 0.004                  |
| ITGB1BP2           | 0.74 (0.62 - 0.90)                          | 0.019                  | 0.71 (0.59 - 0.86)                             | 0.004                  |
| LOX-1              | 2.19 (1.33 - 3.62)                          | 0.020                  | 2.19 (1.34 - 3.59)                             | 0.014                  |



| Biomarker            | ARIC                                        |                        |                                                |                        |
|----------------------|---------------------------------------------|------------------------|------------------------------------------------|------------------------|
|                      | With black race<br>among clinical variables |                        | Without black race<br>among clinical variables |                        |
|                      | OR (CI 95%)                                 | BH adjusted<br>p-value | OR (CI 95%)                                    | BH adjusted<br>p-value |
| STK4                 | 0.72 (0.58 - 0.89)                          | 0.022                  | 0.69 (0.56 - 0.85)                             | 0.006                  |
| CXCL1 (CVD II panel) | 0.73 (0.59 - 0.89)                          | 0.022                  | 0.68 (0.55 - 0.82)                             | 0.002                  |
| SIRT2                | 0.74 (0.61 - 0.90)                          | 0.022                  | 0.71 (0.58 - 0.86)                             | 0.006                  |
| SPON2                | 7.75 (2.01 - 29.83)                         | 0.023                  | 8.35 (2.23 - 31.25)                            | 0.013                  |
| TWEAK                | 0.34 (0.16 - 0.69)                          | 0.023                  | 0.35 (0.17 - 0.71)                             | 0.021                  |
| ANG-1                | 0.72 (0.58 - 0.90)                          | 0.023                  | 0.69 (0.56 - 0.85)                             | 0.006                  |
| 4E-BP1               | 0.65 (0.49 - 0.87)                          | 0.023                  | 0.66 (0.50 - 0.87)                             | 0.020                  |
| TFF3                 | 2.09 (1.28 - 3.42)                          | 0.024                  | 2.29 (1.41 - 3.71)                             | 0.008                  |
| VEGFD                | 2.07 (1.26 - 3.40)                          | 0.028                  | 2.02 (1.23 - 3.29)                             | 0.025                  |
| PIgR                 | 6.69 (1.83 - 24.42)                         | 0.028                  | 9.84 (2.80 - 34.55)                            | 0.005                  |
| NEMO                 | 0.71 (0.56 - 0.90)                          | 0.031                  | 0.70 (0.56 - 0.89)                             | 0.020                  |
| Dkk-1                | 0.54 (0.35 - 0.83)                          | 0.033                  | 0.50 (0.33 - 0.77)                             | 0.013                  |
| SELP                 | 0.55 (0.36 - 0.84)                          | 0.037                  | 0.52 (0.34 - 0.78)                             | 0.014                  |
| CCL17                | 0.76 (0.62 - 0.93)                          | 0.040                  | 0.72 (0.60 - 0.88)                             | 0.009                  |
| IL-4RA               | 2.21 (1.25 - 3.93)                          | 0.041                  | 2.31 (1.32 - 4.04)                             | 0.020                  |
| ST1A1                | 0.75 (0.60 - 0.92)                          | 0.041                  | 0.71 (0.58 - 0.88)                             | 0.012                  |
| MMP-2                | 2.27 (1.25 - 4.11)                          | 0.041                  | 2.09 (1.17 - 3.75)                             | 0.051                  |
| PRELP                | 4.70 (1.51 - 14.64)                         | 0.042                  | 4.39 (1.43 - 13.50)                            | 0.043                  |
| U-PAR                | 2.23 (1.24 - 4.02)                          | 0.042                  | 2.29 (1.28 - 4.08)                             | 0.025                  |

Protein names are available in Supplemental Table 1.

**Supplemental Table 4: C-index improvement for each biomarker on top of clinical model in each cohort**

| Biomarker     | ARIC                                        |                       |         | FRAMINGHAM                                  |                       |         | HOMAGE                                      |                       |         |
|---------------|---------------------------------------------|-----------------------|---------|---------------------------------------------|-----------------------|---------|---------------------------------------------|-----------------------|---------|
|               | C-index (CI 95%)<br>clinical +<br>biomarker | Δ c-index<br>(CI 95%) | p-value | C-index (CI 95%)<br>clinical +<br>biomarker | Δ c-index<br>(CI 95%) | p-value | C-index (CI 95%)<br>clinical +<br>biomarker | Δ c-index<br>(CI 95%) | p-value |
| 4E-BP1        | 71.2 (66.5 to 76.0)                         | 1.5 (-0.7 to 3.6)     | 0.17    | 72.0 (66.9 to 77.1)                         | 2.8 (-0.0 to 5.6)     | 0.050   | 68.7 (65.9 to 71.5)                         | 0.4 (-0.2 to 1.1)     | 0.21    |
| ACE2          | 70.4 (65.6 to 75.2)                         | 0.9 (-0.9 to 2.6)     | 0.31    | 71.3 (66.2 to 76.5)                         | 2.1 (-0.3 to 4.6)     | 0.092   | 69.3 (66.5 to 72.1)                         | 1.0 (0.0 to 2.0)      | 0.049   |
| ADA           | 70.5 (65.7 to 75.3)                         | 0.7 (-0.8 to 2.3)     | 0.32    | 69.1 (63.9 to 74.4)                         | -0.1 (-0.4 to 0.3)    | 0.74    | 68.3 (65.4 to 71.1)                         | 0.0 (-0.0 to 0.1)     | 0.73    |
| ADAM-TS13     | 69.5 (64.7 to 74.4)                         | 0.0 (-0.1 to 0.2)     | 0.67    | 69.2 (64.0 to 74.5)                         | 0.0 (-0.2 to 0.2)     | 0.83    | 68.4 (65.6 to 71.3)                         | 0.1 (-0.2 to 0.5)     | 0.39    |
| ADM           | 72.9 (68.2 to 77.5)                         | 3.4 (0.6 to 6.2)      | 0.018   | 69.5 (64.2 to 74.7)                         | 0.3 (-1.1 to 1.6)     | 0.71    | 69.3 (66.5 to 72.1)                         | 1.0 (-0.0 to 2.1)     | 0.056   |
| AGRP          | 70.6 (65.9 to 75.4)                         | 1.1 (-0.6 to 2.9)     | 0.20    | 69.5 (64.2 to 74.7)                         | 0.3 (-0.4 to 0.9)     | 0.38    | 69.3 (66.5 to 72.1)                         | 1.0 (0.1 to 2.0)      | 0.032   |
| ALCAM         | 69.4 (64.6 to 74.3)                         | 0.0 (-0.2 to 0.3)     | 0.68    | 69.0 (63.7 to 74.3)                         | -0.0 (-0.3 to 0.3)    | 0.92    | 68.5 (65.7 to 71.3)                         | 0.2 (-0.2 to 0.6)     | 0.26    |
| AMBP          | 69.9 (65.1 to 74.7)                         | 0.4 (-0.7 to 1.5)     | 0.48    | 69.1 (63.8 to 74.4)                         | -0.1 (-0.7 to 0.5)    | 0.77    | 68.5 (65.7 to 71.4)                         | 0.2 (-0.3 to 0.8)     | 0.41    |
| ANG-1         | 71.9 (67.2 to 76.6)                         | 2.4 (0.0 to 4.9)      | 0.049   | 69.2 (64.0 to 74.5)                         | 0.0 (-0.2 to 0.3)     | 0.93    | 68.5 (65.6 to 71.3)                         | 0.2 (-0.2 to 0.6)     | 0.34    |
| AP-N          | 69.5 (64.6 to 74.3)                         | 0.1 (-0.6 to 0.8)     | 0.77    | 69.1 (63.8 to 74.3)                         | 0.0 (-0.2 to 0.2)     | 0.80    | 68.4 (65.6 to 71.3)                         | 0.1 (-0.1 to 0.4)     | 0.27    |
| AXIN1         | 71.7 (67.0 to 76.4)                         | 1.9 (-0.6 to 4.4)     | 0.13    | 69.2 (63.9 to 74.4)                         | -0.0 (-0.2 to 0.2)    | 0.71    | 68.4 (65.5 to 71.2)                         | 0.1 (-0.2 to 0.4)     | 0.57    |
| AXL           | 70.3 (65.2 to 75.3)                         | -0.0 (-0.4 to 0.3)    | 0.82    | 69.0 (63.8 to 74.3)                         | 0.0 (-0.1 to 0.1)     | 0.75    | 68.4 (65.6 to 71.3)                         | 0.2 (-0.2 to 0.5)     | 0.32    |
| AZU1          | 69.6 (64.8 to 74.5)                         | 0.3 (-0.6 to 1.1)     | 0.54    | 69.3 (64.0 to 74.5)                         | 0.2 (-0.5 to 0.9)     | 0.52    | 68.4 (65.5 to 71.2)                         | 0.1 (-0.2 to 0.4)     | 0.51    |
| Beta-NGF      | 70.3 (65.5 to 75.1)                         | 0.5 (-0.3 to 1.4)     | 0.21    | 69.2 (64.0 to 74.5)                         | 0.0 (-0.0 to 0.1)     | 0.35    | 68.5 (65.6 to 71.3)                         | 0.2 (-0.2 to 0.6)     | 0.35    |
| BLM hydrolase | 70.5 (65.7 to 75.3)                         | 1.1 (-0.5 to 2.7)     | 0.18    | 69.3 (64.0 to 74.5)                         | 0.2 (-0.4 to 0.8)     | 0.47    | 68.5 (65.6 to 71.3)                         | 0.2 (-0.1 to 0.5)     | 0.24    |
| BMP-6         | 69.5 (64.7 to 74.3)                         | 0.0 (-0.4 to 0.4)     | 0.97    | 69.5 (64.3 to 74.8)                         | 0.3 (-1.0 to 1.6)     | 0.62    | 68.5 (65.6 to 71.3)                         | 0.2 (-0.3 to 0.6)     | 0.40    |
| BNP           | 75.4 (71.0 to 79.8)                         | 5.9 (2.4 to 9.5)      | 0.001   | 74.2 (69.3 to 79.0)                         | 4.9 (1.7 to 8.2)      | 0.002   | 73.9 (71.2 to 76.5)                         | 5.6 (3.7 to 7.5)      | <0.0001 |
| BOC           | 70.3 (65.5 to 75.1)                         | 0.8 (-1.0 to 2.6)     | 0.39    | 69.2 (64.0 to 74.5)                         | 0.0 (-0.4 to 0.5)     | 0.83    | 68.5 (65.7 to 71.4)                         | 0.3 (-0.2 to 0.8)     | 0.28    |
| CA5A          | 69.5 (64.6 to 74.3)                         | -0.0 (-0.2 to 0.1)    | 0.80    | 69.8 (64.6 to 75.1)                         | 0.6 (-0.8 to 2.1)     | 0.39    | 68.3 (65.4 to 71.1)                         | 0.0 (-0.1 to 0.1)     | 0.82    |
| CASP-3        | 71.8 (67.1 to 76.5)                         | 2.4 (-0.3 to 5.1)     | 0.087   | 69.1 (63.8 to 74.3)                         | 0.0 (-0.6 to 0.7)     | 0.91    | 68.5 (65.7 to 71.3)                         | 0.2 (-0.2 to 0.7)     | 0.29    |
| CASP-8        | 70.7 (66.0 to 75.5)                         | 1.0 (-0.9 to 2.8)     | 0.29    | 69.4 (64.1 to 74.6)                         | 0.2 (-1.0 to 1.3)     | 0.77    | 69.1 (66.3 to 72.0)                         | 0.9 (-0.0 to 1.7)     | 0.054   |
| CCL11         | 69.9 (65.0 to 74.7)                         | 0.1 (-0.3 to 0.5)     | 0.58    | 69.3 (64.0 to 74.5)                         | 0.1 (-1.3 to 1.4)     | 0.93    | 68.9 (66.1 to 71.8)                         | 0.7 (-0.1 to 1.4)     | 0.082   |
| CCL15         | 69.4 (64.6 to 74.3)                         | 0.0 (-0.2 to 0.2)     | 0.88    | 69.5 (64.3 to 74.8)                         | 0.5 (-0.7 to 1.7)     | 0.44    | 68.9 (66.1 to 71.7)                         | 0.6 (-0.1 to 1.3)     | 0.081   |
| CCL16         | 70.0 (65.2 to 74.8)                         | 0.7 (-0.7 to 2.0)     | 0.34    | 69.3 (64.0 to 74.5)                         | 0.2 (-0.9 to 1.3)     | 0.69    | 69.8 (67.0 to 72.6)                         | 1.5 (0.4 to 2.6)      | 0.006   |
| CCL17         | 71.5 (66.8 to 76.2)                         | 2.0 (-0.4 to 4.4)     | 0.10    | 69.4 (64.2 to 74.7)                         | 0.2 (-0.7 to 1.2)     | 0.66    | 68.7 (65.9 to 71.5)                         | 0.4 (-0.3 to 1.1)     | 0.21    |
| CCL19         | 71.1 (66.3 to 75.9)                         | 1.3 (-0.9 to 3.6)     | 0.24    | 70.2 (65.0 to 75.4)                         | 1.0 (-0.4 to 2.4)     | 0.14    | 68.5 (65.7 to 71.3)                         | 0.2 (-0.3 to 0.7)     | 0.39    |
| CCL20         | 69.7 (64.9 to 74.5)                         | -0.1 (-0.5 to 0.4)    | 0.78    | 69.3 (64.0 to 74.5)                         | 0.1 (-0.3 to 0.4)     | 0.73    | 68.6 (65.8 to 71.4)                         | 0.3 (-0.3 to 0.9)     | 0.27    |
| CCL23         | 69.8 (65.0 to 74.7)                         | 0.1 (-1.1 to 1.2)     | 0.90    | 69.3 (64.1 to 74.6)                         | 0.1 (-0.6 to 0.8)     | 0.74    | 68.7 (65.9 to 71.6)                         | 0.5 (-0.1 to 1.1)     | 0.10    |
| CCL24         | 69.3 (64.5 to 74.2)                         | -0.0 (-0.2 to 0.1)    | 0.52    | 69.1 (63.9 to 74.4)                         | 0.1 (-0.5 to 0.7)     | 0.78    | 68.3 (65.4 to 71.1)                         | 0.0 (-0.0 to 0.0)     | 0.48    |
| CCL25         | 70.2 (65.4 to 75.0)                         | 0.4 (-0.5 to 1.4)     | 0.37    | 69.9 (64.7 to 75.1)                         | 0.7 (-0.8 to 2.2)     | 0.35    | 68.4 (65.6 to 71.3)                         | 0.2 (-0.2 to 0.5)     | 0.39    |
| CCL28         | 69.9 (65.1 to 74.7)                         | 0.1 (-0.2 to 0.5)     | 0.46    | 69.6 (64.4 to 74.9)                         | 0.4 (-0.6 to 1.4)     | 0.41    | 68.4 (65.5 to 71.2)                         | 0.1 (-0.2 to 0.4)     | 0.52    |

| Biomarker | ARIC                                        |                              |         | FRAMINGHAM                                  |                              |         | HOMAGE                                      |                              |         |
|-----------|---------------------------------------------|------------------------------|---------|---------------------------------------------|------------------------------|---------|---------------------------------------------|------------------------------|---------|
|           | C-index (CI 95%)<br>clinical +<br>biomarker | $\Delta$ c-index<br>(CI 95%) | p-value | C-index (CI 95%)<br>clinical +<br>biomarker | $\Delta$ c-index<br>(CI 95%) | p-value | C-index (CI 95%)<br>clinical +<br>biomarker | $\Delta$ c-index<br>(CI 95%) | p-value |
| CCL3      | 69.9 (65.1 to 74.7)                         | 0.4 (-0.5 to 1.3)            | 0.34    | 69.5 (64.3 to 74.8)                         | 0.3 (-1.2 to 1.9)            | 0.67    | 68.3 (65.5 to 71.2)                         | 0.0 (-0.2 to 0.3)            | 0.73    |
| CCL4      | 70.1 (65.3 to 75.0)                         | 0.4 (-0.8 to 1.6)            | 0.55    | 69.7 (64.4 to 74.9)                         | 0.5 (-1.1 to 2.1)            | 0.56    | 68.4 (65.6 to 71.2)                         | 0.1 (-0.1 to 0.4)            | 0.33    |
| CD163     | 69.3 (64.5 to 74.2)                         | -0.1 (-0.7 to 0.6)           | 0.84    | 69.1 (63.9 to 74.4)                         | 0.1 (-0.7 to 0.8)            | 0.81    | 68.6 (65.8 to 71.4)                         | 0.3 (-0.2 to 0.8)            | 0.17    |
| CD244     | 70.2 (65.4 to 75.0)                         | 0.5 (-0.9 to 1.8)            | 0.50    | 69.3 (64.0 to 74.5)                         | 0.0 (-0.7 to 0.8)            | 0.89    | 68.3 (65.4 to 71.1)                         | -0.0 (-0.1 to 0.1)           | 0.69    |
| CD4       | 69.7 (64.9 to 74.6)                         | 0.2 (-1.3 to 1.8)            | 0.76    | 69.4 (64.1 to 74.6)                         | 0.2 (-0.6 to 1.0)            | 0.67    | 69.2 (66.3 to 72.0)                         | 0.9 (-0.1 to 1.8)            | 0.064   |
| CD40      | 69.9 (65.0 to 74.7)                         | 0.1 (-1.0 to 1.3)            | 0.85    | 70.7 (65.5 to 75.9)                         | 1.5 (-0.7 to 3.7)            | 0.18    | 69.1 (66.3 to 71.9)                         | 0.8 (-0.0 to 1.6)            | 0.054   |
| CD40-L    | 71.8 (67.1 to 76.5)                         | 2.3 (-0.2 to 4.8)            | 0.070   | 69.2 (64.0 to 74.5)                         | 0.0 (-0.3 to 0.4)            | 0.88    | 68.6 (65.8 to 71.4)                         | 0.3 (-0.2 to 0.9)            | 0.24    |
| CD5       | 70.1 (65.3 to 75.0)                         | 0.4 (-0.9 to 1.6)            | 0.55    | 69.2 (64.0 to 74.5)                         | 0.0 (-0.1 to 0.2)            | 0.75    | 68.3 (65.5 to 71.2)                         | 0.0 (-0.2 to 0.3)            | 0.65    |
| CD6       | 70.1 (65.3 to 74.9)                         | 0.4 (-0.7 to 1.4)            | 0.51    | 69.3 (64.1 to 74.6)                         | 0.1 (-0.6 to 0.8)            | 0.69    | 68.3 (65.4 to 71.1)                         | -0.0 (-0.0 to 0.0)           | 0.87    |
| CD84      | 70.6 (65.9 to 75.4)                         | 1.1 (-1.1 to 3.3)            | 0.31    | 69.6 (64.3 to 74.8)                         | 0.4 (-0.6 to 1.4)            | 0.46    | 68.5 (65.6 to 71.3)                         | 0.2 (-0.3 to 0.6)            | 0.44    |
| CD93      | 70.5 (65.8 to 75.3)                         | 1.1 (-0.9 to 3.2)            | 0.28    | 69.2 (63.9 to 74.5)                         | 0.1 (-0.4 to 0.6)            | 0.59    | 68.7 (65.9 to 71.5)                         | 0.4 (-0.2 to 1.0)            | 0.17    |
| CDCP1     | 70.4 (65.6 to 75.2)                         | 0.7 (-0.5 to 1.8)            | 0.25    | 69.4 (64.1 to 74.7)                         | 0.2 (-1.3 to 1.7)            | 0.79    | 68.4 (65.6 to 71.3)                         | 0.2 (-0.2 to 0.5)            | 0.33    |
| CDH5      | 69.5 (64.7 to 74.4)                         | 0.1 (-0.3 to 0.6)            | 0.55    | 69.0 (63.7 to 74.3)                         | -0.0 (-0.6 to 0.6)           | 0.95    | 68.3 (65.5 to 71.2)                         | 0.0 (-0.1 to 0.1)            | 0.43    |
| CEACAM8   | 71.4 (66.6 to 76.2)                         | 1.9 (-0.4 to 4.2)            | 0.11    | 70.7 (65.5 to 75.9)                         | 1.5 (-0.7 to 3.6)            | 0.17    | 69.5 (66.7 to 72.3)                         | 1.2 (0.2 to 2.3)             | 0.021   |
| CHI3L1    | 69.5 (64.7 to 74.4)                         | 0.1 (-0.8 to 1.1)            | 0.78    | 69.0 (63.7 to 74.3)                         | -0.0 (-0.2 to 0.1)           | 0.62    | 68.7 (65.9 to 71.6)                         | 0.5 (-0.2 to 1.1)            | 0.15    |
| CHIT1     | 69.5 (64.6 to 74.3)                         | 0.1 (-0.8 to 1.0)            | 0.84    | 69.1 (63.8 to 74.4)                         | 0.1 (-0.1 to 0.2)            | 0.55    | 68.5 (65.6 to 71.3)                         | 0.2 (-0.2 to 0.6)            | 0.36    |
| CNTN1     | 70.2 (65.4 to 75.0)                         | 0.8 (-0.7 to 2.4)            | 0.29    | 69.2 (64.0 to 74.5)                         | 0.2 (-0.6 to 1.0)            | 0.64    | 68.3 (65.5 to 71.2)                         | 0.1 (-0.3 to 0.4)            | 0.71    |
| COL1A1    | 69.4 (64.5 to 74.2)                         | 0.0 (-0.1 to 0.1)            | 0.95    | 69.0 (63.7 to 74.2)                         | -0.1 (-0.6 to 0.5)           | 0.76    | 68.3 (65.4 to 71.1)                         | 0.0 (-0.2 to 0.2)            | 1.00    |
| CPA1      | 69.4 (64.5 to 74.2)                         | 0.0 (-0.2 to 0.3)            | 0.97    | 69.3 (64.1 to 74.6)                         | 0.3 (-0.9 to 1.4)            | 0.63    | 68.3 (65.4 to 71.1)                         | 0.0 (-0.1 to 0.1)            | 0.89    |
| CPB1      | 69.5 (64.6 to 74.4)                         | 0.1 (-0.4 to 0.7)            | 0.69    | 69.2 (63.9 to 74.5)                         | 0.2 (-1.0 to 1.3)            | 0.76    | 68.4 (65.6 to 71.3)                         | 0.2 (-0.2 to 0.5)            | 0.43    |
| CSF-1     | 70.1 (65.3 to 75.0)                         | 0.4 (-1.1 to 1.8)            | 0.60    | 69.8 (64.6 to 75.0)                         | 0.6 (-1.1 to 2.2)            | 0.49    | 68.6 (65.8 to 71.5)                         | 0.4 (-0.2 to 0.9)            | 0.19    |
| CST5      | 70.7 (66.0 to 75.5)                         | 1.0 (-1.1 to 3.1)            | 0.35    | 69.2 (64.0 to 74.5)                         | 0.0 (-0.2 to 0.2)            | 1.00    | 68.3 (65.5 to 71.2)                         | 0.0 (-0.1 to 0.2)            | 0.56    |
| CSTB      | 69.7 (64.9 to 74.5)                         | 0.3 (-0.3 to 0.9)            | 0.30    | 70.0 (64.8 to 75.2)                         | 1.0 (-1.3 to 3.3)            | 0.39    | 69.6 (66.9 to 72.4)                         | 1.4 (0.3 to 2.4)             | 0.010   |
| CTRC      | 69.8 (65.0 to 74.6)                         | 0.3 (-0.7 to 1.3)            | 0.53    | 69.3 (64.0 to 74.5)                         | 0.1 (-0.3 to 0.5)            | 0.72    | 68.3 (65.5 to 71.2)                         | 0.0 (-0.1 to 0.2)            | 0.53    |
| CTSD      | 69.6 (64.8 to 74.5)                         | 0.2 (-0.5 to 0.9)            | 0.60    | 69.3 (64.0 to 74.6)                         | 0.2 (-0.9 to 1.3)            | 0.66    | 68.3 (65.4 to 71.1)                         | 0.0 (-0.1 to 0.1)            | 0.87    |
| CTSL1     | 70.2 (65.4 to 75.0)                         | 0.7 (-0.8 to 2.2)            | 0.35    | 69.1 (63.8 to 74.3)                         | -0.1 (-1.2 to 0.9)           | 0.78    | 68.7 (65.8 to 71.5)                         | 0.4 (-0.2 to 1.0)            | 0.18    |
| CTSZ      | 69.8 (65.0 to 74.6)                         | 0.4 (-0.5 to 1.4)            | 0.39    | 69.7 (64.5 to 75.0)                         | 0.7 (-0.9 to 2.3)            | 0.40    | 68.7 (65.9 to 71.5)                         | 0.4 (-0.2 to 1.0)            | 0.15    |
| CX3CL1    | 70.0 (65.2 to 74.8)                         | 0.2 (-0.7 to 1.2)            | 0.66    | 70.1 (64.9 to 75.3)                         | 0.9 (-0.5 to 2.3)            | 0.20    | 68.4 (65.6 to 71.3)                         | 0.1 (-0.2 to 0.5)            | 0.41    |
| CXCL1     | 71.9 (67.2 to 76.6)                         | 2.4 (-0.3 to 5.1)            | 0.083   | 69.3 (64.0 to 74.6)                         | 0.1 (-0.4 to 0.6)            | 0.68    | 68.3 (65.4 to 71.1)                         | 0.0 (-0.2 to 0.2)            | 0.90    |
| CXCL10    | 70.0 (65.2 to 74.9)                         | 0.3 (-0.5 to 1.1)            | 0.49    | 70.3 (65.1 to 75.5)                         | 1.1 (-0.7 to 2.9)            | 0.22    | 68.8 (66.0 to 71.6)                         | 0.5 (-0.1 to 1.2)            | 0.085   |
| CXCL11    | 70.7 (65.9 to 75.4)                         | 0.9 (-0.5 to 2.3)            | 0.22    | 69.3 (64.1 to 74.6)                         | 0.1 (-0.8 to 1.1)            | 0.77    | 69.4 (66.6 to 72.2)                         | 1.1 (0.1 to 2.1)             | 0.027   |
| CXCL16    | 69.7 (64.9 to 74.6)                         | 0.3 (-0.3 to 0.9)            | 0.29    | 70.4 (65.3 to 75.6)                         | 1.4 (-0.9 to 3.7)            | 0.23    | 68.9 (66.0 to 71.7)                         | 0.6 (-0.0 to 1.2)            | 0.059   |
| CXCL5     | 72.8 (68.1 to 77.4)                         | 3.0 (0.1 to 5.9)             | 0.041   | 69.2 (63.9 to 74.4)                         | -0.0 (-0.5 to 0.4)           | 0.91    | 68.3 (65.4 to 71.1)                         | 0.0 (-0.1 to 0.1)            | 0.87    |

| Biomarker | ARIC                                        |                              |         | FRAMINGHAM                                  |                              |         | HOMAGE                                      |                              |         |
|-----------|---------------------------------------------|------------------------------|---------|---------------------------------------------|------------------------------|---------|---------------------------------------------|------------------------------|---------|
|           | C-index (CI 95%)<br>clinical +<br>biomarker | $\Delta$ c-index<br>(CI 95%) | p-value | C-index (CI 95%)<br>clinical +<br>biomarker | $\Delta$ c-index<br>(CI 95%) | p-value | C-index (CI 95%)<br>clinical +<br>biomarker | $\Delta$ c-index<br>(CI 95%) | p-value |
| CXCL6     | 70.5 (65.7 to 75.3)                         | 0.8 (-0.6 to 2.2)            | 0.27    | 69.2 (64.0 to 74.5)                         | 0.0 (-0.1 to 0.1)            | 0.61    | 68.4 (65.5 to 71.2)                         | 0.1 (-0.3 to 0.5)            | 0.67    |
| CXCL9     | 70.3 (65.5 to 75.1)                         | 0.6 (-1.0 to 2.1)            | 0.46    | 69.9 (64.7 to 75.1)                         | 0.7 (-0.9 to 2.3)            | 0.40    | 69.3 (66.6 to 72.1)                         | 1.1 (0.2 to 2.0)             | 0.019   |
| DCN       | 69.5 (64.7 to 74.4)                         | 0.0 (-0.6 to 0.7)            | 0.91    | 69.3 (64.0 to 74.5)                         | 0.1 (-0.2 to 0.3)            | 0.52    | 68.4 (65.6 to 71.3)                         | 0.2 (-0.3 to 0.6)            | 0.44    |
| DECR1     | 71.1 (66.3 to 75.9)                         | 1.6 (-0.4 to 3.7)            | 0.11    | 69.2 (64.0 to 74.5)                         | 0.0 (-0.6 to 0.6)            | 0.90    | 68.6 (65.8 to 71.5)                         | 0.3 (-0.2 to 0.9)            | 0.22    |
| Dkk-1     | 71.6 (66.9 to 76.4)                         | 2.1 (-0.2 to 4.5)            | 0.078   | 69.5 (64.3 to 74.8)                         | 0.3 (-0.5 to 1.2)            | 0.45    | 68.7 (65.9 to 71.5)                         | 0.4 (-0.2 to 1.0)            | 0.15    |
| DLK-1     | 69.4 (64.6 to 74.3)                         | 0.0 (-0.3 to 0.4)            | 0.83    | 69.2 (64.0 to 74.5)                         | 0.2 (-0.8 to 1.1)            | 0.71    | 68.4 (65.6 to 71.2)                         | 0.1 (-0.2 to 0.4)            | 0.39    |
| DNER      | 72.2 (67.5 to 76.9)                         | 2.4 (0.0 to 4.9)             | 0.048   | 70.2 (65.0 to 75.4)                         | 1.0 (-0.5 to 2.5)            | 0.20    | 68.5 (65.7 to 71.3)                         | 0.2 (-0.4 to 0.8)            | 0.48    |
| EGFR      | 70.5 (65.7 to 75.3)                         | 1.1 (-0.9 to 3.1)            | 0.26    | 69.1 (63.9 to 74.4)                         | 0.1 (-0.6 to 0.8)            | 0.76    | 68.3 (65.4 to 71.1)                         | -0.0 (-0.3 to 0.2)           | 0.94    |
| EN-RAGE   | 69.8 (65.0 to 74.7)                         | 0.1 (-1.0 to 1.1)            | 0.91    | 70.9 (65.7 to 76.1)                         | 1.7 (-0.3 to 3.7)            | 0.10    | 69.5 (66.7 to 72.3)                         | 1.2 (0.3 to 2.1)             | 0.012   |
| Ep-CAM    | 69.6 (64.8 to 74.4)                         | 0.2 (-1.1 to 1.5)            | 0.76    | 69.1 (63.8 to 74.4)                         | 0.1 (-0.3 to 0.5)            | 0.70    | 68.3 (65.4 to 71.1)                         | -0.0 (-0.1 to 0.1)           | 0.88    |
| EPHB4     | 69.7 (64.9 to 74.6)                         | 0.3 (-0.4 to 1.1)            | 0.38    | 69.3 (64.1 to 74.6)                         | 0.3 (-0.8 to 1.4)            | 0.60    | 68.9 (66.0 to 71.7)                         | 0.6 (-0.0 to 1.2)            | 0.061   |
| FABP2     | 69.8 (64.9 to 74.6)                         | 0.3 (-0.4 to 1.0)            | 0.42    | 69.5 (64.2 to 74.7)                         | 0.3 (-0.8 to 1.3)            | 0.62    | 68.6 (65.8 to 71.4)                         | 0.3 (-0.2 to 0.9)            | 0.26    |
| FABP4     | 69.4 (64.6 to 74.3)                         | 0.0 (-0.3 to 0.4)            | 0.82    | 69.6 (64.4 to 74.9)                         | 0.6 (-1.1 to 2.3)            | 0.49    | 69.7 (66.9 to 72.5)                         | 1.4 (0.3 to 2.5)             | 0.009   |
| FAS       | 69.7 (64.8 to 74.5)                         | 0.3 (-0.6 to 1.2)            | 0.56    | 69.5 (64.3 to 74.8)                         | 0.5 (-0.7 to 1.7)            | 0.41    | 68.8 (66.0 to 71.6)                         | 0.5 (-0.2 to 1.2)            | 0.16    |
| FGF-19    | 70.1 (65.3 to 75.0)                         | 0.4 (-0.8 to 1.6)            | 0.52    | 69.4 (64.1 to 74.7)                         | 0.2 (-0.3 to 0.7)            | 0.45    | 68.3 (65.5 to 71.2)                         | 0.1 (-0.2 to 0.3)            | 0.62    |
| FGF-21    | 71.5 (66.7 to 76.2)                         | 2.0 (0.0 to 3.9)             | 0.048   | 69.4 (64.2 to 74.7)                         | 0.2 (-0.4 to 0.8)            | 0.46    | 68.4 (65.6 to 71.2)                         | 0.1 (-0.3 to 0.5)            | 0.54    |
| FGF-23    | 70.8 (66.1 to 75.6)                         | 1.3 (-0.6 to 3.3)            | 0.17    | 69.8 (64.6 to 75.0)                         | 0.6 (-1.2 to 2.4)            | 0.51    | 70.2 (67.4 to 72.9)                         | 1.9 (0.7 to 3.1)             | 0.002   |
| FGF-5     | 69.9 (65.0 to 74.7)                         | 0.1 (-0.5 to 0.7)            | 0.71    | 69.3 (64.1 to 74.6)                         | 0.1 (-0.5 to 0.8)            | 0.67    | 68.3 (65.4 to 71.1)                         | 0.0 (-0.1 to 0.1)            | 0.83    |
| Flt3L     | 70.0 (65.1 to 74.8)                         | 0.2 (-0.2 to 0.6)            | 0.38    | 69.2 (63.9 to 74.4)                         | -0.0 (-0.2 to 0.2)           | 0.90    | 68.3 (65.5 to 71.2)                         | 0.1 (-0.1 to 0.2)            | 0.58    |
| FS        | 70.1 (65.3 to 74.9)                         | 0.7 (-0.7 to 2.0)            | 0.34    | 69.0 (63.8 to 74.3)                         | -0.2 (-1.0 to 0.7)           | 0.68    | 68.7 (65.9 to 71.5)                         | 0.4 (-0.2 to 1.0)            | 0.16    |
| Gal-3     | 70.4 (65.5 to 75.2)                         | 1.0 (-0.4 to 2.3)            | 0.15    | 69.2 (64.0 to 74.5)                         | 0.2 (-1.2 to 1.6)            | 0.76    | 68.8 (66.0 to 71.7)                         | 0.6 (-0.0 to 1.2)            | 0.066   |
| Gal-4     | 70.4 (65.6 to 75.2)                         | 1.0 (-0.6 to 2.6)            | 0.21    | 71.7 (66.6 to 76.8)                         | 2.7 (-0.3 to 5.6)            | 0.075   | 69.4 (66.6 to 72.2)                         | 1.1 (0.2 to 2.0)             | 0.016   |
| Gal-9     | 70.4 (65.6 to 75.1)                         | 0.9 (-1.2 to 3.0)            | 0.41    | 70.8 (65.7 to 76.0)                         | 1.6 (-0.8 to 4.1)            | 0.19    | 70.0 (67.2 to 72.8)                         | 1.7 (0.4 to 3.0)             | 0.009   |
| GDF-15    | 70.2 (65.4 to 75.0)                         | 0.8 (-1.1 to 2.7)            | 0.41    | 74.2 (69.3 to 79.2)                         | 5.2 (1.8 to 8.6)             | 0.002   | 71.3 (68.5 to 74.0)                         | 3.0 (1.5 to 4.5)             | <0.0001 |
| GDF-2     | 69.6 (64.7 to 74.4)                         | 0.1 (-0.2 to 0.3)            | 0.53    | 69.8 (64.6 to 75.0)                         | 0.6 (-1.2 to 2.4)            | 0.50    | 68.3 (65.5 to 71.1)                         | 0.0 (-0.2 to 0.2)            | 0.80    |
| GDNF      | 70.2 (65.4 to 75.1)                         | 0.5 (-0.2 to 1.2)            | 0.19    | 69.4 (64.2 to 74.7)                         | 0.2 (-1.0 to 1.5)            | 0.71    | 68.3 (65.5 to 71.1)                         | 0.0 (-0.1 to 0.1)            | 0.79    |
| GH        | 69.4 (64.6 to 74.3)                         | -0.1 (-0.8 to 0.7)           | 0.87    | 69.7 (64.5 to 74.9)                         | 0.5 (-1.0 to 2.0)            | 0.49    | 68.5 (65.6 to 71.3)                         | 0.2 (-0.1 to 0.5)            | 0.27    |
| GIF       | 70.2 (65.3 to 75.0)                         | 0.7 (-0.2 to 1.6)            | 0.14    | 69.3 (64.0 to 74.5)                         | 0.1 (-0.3 to 0.4)            | 0.66    | 68.3 (65.4 to 71.1)                         | -0.0 (-0.0 to 0.0)           | 0.76    |
| GLO1      | 70.9 (66.1 to 75.7)                         | 1.4 (-0.4 to 3.2)            | 0.12    | 70.0 (64.7 to 75.2)                         | 0.8 (-0.9 to 2.4)            | 0.36    | 68.3 (65.5 to 71.2)                         | 0.0 (-0.2 to 0.3)            | 0.71    |
| GRN       | 69.4 (64.5 to 74.2)                         | -0.0 (-0.7 to 0.6)           | 0.95    | 69.0 (63.8 to 74.3)                         | -0.0 (-0.0 to 0.0)           | 0.50    | 68.8 (66.0 to 71.6)                         | 0.5 (-0.1 to 1.1)            | 0.12    |
| GT        | 69.5 (64.6 to 74.3)                         | -0.0 (-0.3 to 0.3)           | 0.90    | 69.2 (64.0 to 74.5)                         | 0.0 (-0.1 to 0.2)            | 0.91    | 68.6 (65.7 to 71.4)                         | 0.3 (-0.3 to 0.9)            | 0.33    |
| HAOX1     | 69.6 (64.8 to 74.5)                         | 0.2 (-0.4 to 0.7)            | 0.59    | 69.7 (64.5 to 74.9)                         | 0.5 (-0.7 to 1.7)            | 0.40    | 68.4 (65.6 to 71.3)                         | 0.2 (-0.2 to 0.5)            | 0.32    |
| HB-EGF    | 72.2 (67.5 to 76.9)                         | 2.7 (0.1 to 5.2)             | 0.038   | 69.2 (64.0 to 74.5)                         | 0.0 (-0.2 to 0.2)            | 0.89    | 68.7 (65.9 to 71.6)                         | 0.5 (-0.1 to 1.0)            | 0.10    |

| Biomarker            | ARIC                                        |                              |         | FRAMINGHAM                                  |                              |         | HOMAGE                                      |                              |         |
|----------------------|---------------------------------------------|------------------------------|---------|---------------------------------------------|------------------------------|---------|---------------------------------------------|------------------------------|---------|
|                      | C-index (CI 95%)<br>clinical +<br>biomarker | $\Delta$ c-index<br>(CI 95%) | p-value | C-index (CI 95%)<br>clinical +<br>biomarker | $\Delta$ c-index<br>(CI 95%) | p-value | C-index (CI 95%)<br>clinical +<br>biomarker | $\Delta$ c-index<br>(CI 95%) | p-value |
| HGF                  | 71.0 (66.2 to 75.7)                         | 1.2 (-0.9 to 3.3)            | 0.27    | 73.2 (68.2 to 78.1)                         | 4.0 (1.0 to 6.9)             | 0.009   | 69.5 (66.7 to 72.3)                         | 1.2 (0.2 to 2.2)             | 0.014   |
| HO-1                 | 69.5 (64.7 to 74.3)                         | 0.0 (-1.0 to 1.1)            | 0.94    | 69.6 (64.3 to 74.8)                         | 0.4 (-0.3 to 1.0)            | 0.26    | 68.4 (65.6 to 71.3)                         | 0.1 (-0.3 to 0.6)            | 0.49    |
| hOSCAR               | 69.6 (64.8 to 74.5)                         | 0.2 (-0.7 to 1.0)            | 0.70    | 69.3 (64.0 to 74.5)                         | 0.1 (-0.4 to 0.5)            | 0.73    | 68.8 (65.9 to 71.6)                         | 0.5 (-0.2 to 1.1)            | 0.15    |
| HSP 27               | 71.8 (67.1 to 76.4)                         | 2.3 (-0.2 to 4.7)            | 0.066   | 69.2 (63.9 to 74.4)                         | -0.0 (-0.3 to 0.2)           | 0.76    | 68.8 (66.0 to 71.6)                         | 0.5 (-0.3 to 1.3)            | 0.19    |
| ICAM-2               | 69.3 (64.5 to 74.2)                         | -0.1 (-0.4 to 0.2)           | 0.62    | 69.0 (63.7 to 74.3)                         | -0.0 (-0.3 to 0.2)           | 0.91    | 68.9 (66.1 to 71.7)                         | 0.6 (-0.1 to 1.3)            | 0.070   |
| IDUA                 | 69.5 (64.7 to 74.3)                         | 0.0 (-0.9 to 0.9)            | 0.96    | 69.2 (63.9 to 74.5)                         | -0.0 (-0.3 to 0.3)           | 0.97    | 68.3 (65.5 to 71.2)                         | 0.0 (-0.2 to 0.3)            | 0.70    |
| IGFBP-1              | 69.8 (65.0 to 74.6)                         | 0.4 (-0.9 to 1.7)            | 0.53    | 69.0 (63.8 to 74.3)                         | 0.0 (-0.9 to 0.9)            | 0.99    | 70.2 (67.4 to 72.9)                         | 1.9 (0.7 to 3.0)             | 0.001   |
| IGFBP-2              | 70.7 (65.9 to 75.5)                         | 1.3 (-0.7 to 3.3)            | 0.19    | 69.2 (64.0 to 74.5)                         | 0.2 (-1.1 to 1.5)            | 0.77    | 69.7 (67.0 to 72.5)                         | 1.5 (0.4 to 2.5)             | 0.006   |
| IGFBP-7              | 69.3 (64.5 to 74.1)                         | -0.1 (-1.2 to 1.0)           | 0.86    | 71.2 (66.0 to 76.4)                         | 2.2 (-0.3 to 4.6)            | 0.079   | 69.1 (66.3 to 71.9)                         | 0.8 (0.0 to 1.6)             | 0.043   |
| IgG Fc receptor II-b | 69.4 (64.5 to 74.2)                         | -0.1 (-0.6 to 0.3)           | 0.63    | 69.2 (63.9 to 74.4)                         | -0.0 (-0.4 to 0.3)           | 0.79    | 68.6 (65.7 to 71.4)                         | 0.3 (-0.2 to 0.7)            | 0.22    |
| IL10                 | 70.0 (65.2 to 74.8)                         | 0.2 (-1.2 to 1.6)            | 0.75    | 69.5 (64.2 to 74.7)                         | 0.3 (-1.2 to 1.8)            | 0.72    | 68.5 (65.6 to 71.3)                         | 0.2 (-0.2 to 0.5)            | 0.32    |
| IL-10RA              | 70.4 (65.6 to 75.2)                         | 0.6 (-0.9 to 2.2)            | 0.43    | 69.4 (64.2 to 74.7)                         | 0.2 (-0.1 to 0.6)            | 0.22    | 68.3 (65.5 to 71.1)                         | 0.0 (-0.1 to 0.2)            | 0.73    |
| IL-10RB              | 70.2 (65.4 to 75.0)                         | 0.5 (-1.1 to 2.1)            | 0.54    | 69.5 (64.3 to 74.8)                         | 0.3 (-0.7 to 1.3)            | 0.54    | 68.4 (65.6 to 71.2)                         | 0.1 (-0.2 to 0.5)            | 0.42    |
| IL-12B               | 70.2 (65.4 to 75.0)                         | 0.4 (-0.6 to 1.4)            | 0.40    | 69.7 (64.5 to 75.0)                         | 0.5 (-0.6 to 1.7)            | 0.35    | 68.7 (65.8 to 71.5)                         | 0.4 (-0.2 to 1.0)            | 0.19    |
| IL-15RA              | 70.0 (65.1 to 74.8)                         | 0.2 (-0.3 to 0.7)            | 0.44    | 69.4 (64.1 to 74.6)                         | 0.2 (-1.3 to 1.6)            | 0.83    | 69.0 (66.2 to 71.8)                         | 0.7 (-0.0 to 1.4)            | 0.062   |
| IL16                 | 70.1 (65.3 to 74.9)                         | 0.6 (-0.8 to 2.0)            | 0.40    | 69.2 (64.0 to 74.5)                         | 0.0 (-0.3 to 0.4)            | 0.87    | 68.8 (66.0 to 71.7)                         | 0.6 (-0.2 to 1.4)            | 0.16    |
| IL-17A               | 69.7 (64.9 to 74.6)                         | -0.0 (-0.6 to 0.5)           | 0.88    | 69.2 (64.0 to 74.5)                         | 0.0 (-0.1 to 0.1)            | 0.91    | 68.3 (65.5 to 71.2)                         | 0.1 (-0.2 to 0.3)            | 0.57    |
| IL-17C               | 70.1 (65.3 to 74.9)                         | 0.3 (-1.2 to 1.9)            | 0.68    | 69.2 (64.0 to 74.5)                         | 0.0 (-0.3 to 0.3)            | 0.95    | 68.5 (65.7 to 71.3)                         | 0.2 (-0.2 to 0.7)            | 0.31    |
| IL-17D               | 69.6 (64.7 to 74.4)                         | 0.1 (-0.2 to 0.4)            | 0.58    | 69.9 (64.7 to 75.1)                         | 0.7 (-0.6 to 2.0)            | 0.32    | 68.5 (65.6 to 71.3)                         | 0.2 (-0.3 to 0.7)            | 0.47    |
| IL-17RA              | 69.3 (64.5 to 74.2)                         | -0.1 (-0.6 to 0.4)           | 0.73    | 69.4 (64.1 to 74.6)                         | 0.3 (-0.8 to 1.5)            | 0.58    | 68.3 (65.5 to 71.1)                         | 0.0 (-0.1 to 0.2)            | 0.69    |
| IL18                 | 69.5 (64.7 to 74.4)                         | 0.0 (-0.9 to 1.0)            | 0.96    | 69.3 (64.1 to 74.6)                         | 0.1 (-1.1 to 1.3)            | 0.86    | 68.7 (65.9 to 71.5)                         | 0.4 (-0.2 to 1.1)            | 0.20    |
| IL-18BP              | 69.6 (64.8 to 74.4)                         | 0.2 (-0.5 to 0.9)            | 0.57    | 69.4 (64.1 to 74.6)                         | 0.3 (-0.9 to 1.6)            | 0.60    | 68.9 (66.1 to 71.7)                         | 0.6 (-0.1 to 1.3)            | 0.079   |
| IL-18R1              | 70.0 (65.1 to 74.8)                         | 0.2 (-0.2 to 0.6)            | 0.27    | 69.7 (64.5 to 75.0)                         | 0.5 (-0.8 to 1.9)            | 0.43    | 68.3 (65.5 to 71.2)                         | 0.1 (-0.1 to 0.3)            | 0.55    |
| IL-1ra               | 70.1 (65.3 to 74.9)                         | 0.6 (-0.6 to 1.8)            | 0.32    | 69.2 (64.0 to 74.5)                         | 0.0 (-0.4 to 0.4)            | 0.94    | 68.8 (66.0 to 71.7)                         | 0.6 (-0.3 to 1.4)            | 0.17    |
| IL1RL2               | 70.2 (65.4 to 75.0)                         | 0.7 (-0.9 to 2.3)            | 0.38    | 69.4 (64.2 to 74.7)                         | 0.2 (-0.4 to 0.9)            | 0.52    | 68.3 (65.4 to 71.1)                         | -0.0 (-0.2 to 0.1)           | 0.87    |
| IL-1RT1              | 69.6 (64.8 to 74.5)                         | 0.2 (-0.7 to 1.2)            | 0.62    | 69.9 (64.7 to 75.2)                         | 0.9 (-0.7 to 2.5)            | 0.26    | 68.5 (65.7 to 71.4)                         | 0.3 (-0.1 to 0.7)            | 0.18    |
| IL-1RT2              | 69.7 (64.8 to 74.5)                         | 0.3 (-0.2 to 0.7)            | 0.28    | 70.0 (64.7 to 75.2)                         | 0.9 (-0.5 to 2.3)            | 0.21    | 68.3 (65.5 to 71.1)                         | 0.0 (-0.0 to 0.1)            | 0.49    |
| IL-27                | 70.4 (65.6 to 75.2)                         | 0.9 (-1.4 to 3.2)            | 0.43    | 69.4 (64.1 to 74.6)                         | 0.2 (-1.0 to 1.4)            | 0.76    | 69.2 (66.4 to 72.0)                         | 0.9 (0.1 to 1.8)             | 0.037   |
| IL2-RA               | 70.5 (65.7 to 75.3)                         | 1.1 (-0.8 to 3.0)            | 0.26    | 70.1 (64.8 to 75.3)                         | 1.0 (-0.7 to 2.7)            | 0.23    | 69.4 (66.6 to 72.2)                         | 1.1 (0.2 to 2.0)             | 0.018   |
| IL-4RA               | 70.8 (66.0 to 75.5)                         | 1.3 (-0.8 to 3.3)            | 0.22    | 69.4 (64.2 to 74.7)                         | 0.2 (-0.8 to 1.3)            | 0.67    | 68.9 (66.0 to 71.7)                         | 0.6 (-0.2 to 1.4)            | 0.14    |
| IL6                  | 71.0 (66.2 to 75.7)                         | 1.5 (-0.6 to 3.5)            | 0.16    | 70.7 (65.6 to 75.9)                         | 1.5 (-0.5 to 3.6)            | 0.14    | 69.4 (66.6 to 72.2)                         | 1.1 (0.3 to 2.0)             | 0.009   |
| IL-6RA               | 69.9 (65.1 to 74.8)                         | 0.5 (-0.4 to 1.4)            | 0.24    | 69.2 (63.9 to 74.4)                         | 0.1 (-0.6 to 0.9)            | 0.72    | 69.0 (66.2 to 71.9)                         | 0.8 (0.0 to 1.5)             | 0.041   |
| IL7                  | 71.0 (66.2 to 75.8)                         | 1.3 (-0.6 to 3.1)            | 0.17    | 69.3 (64.0 to 74.5)                         | 0.1 (-0.1 to 0.3)            | 0.47    | 68.4 (65.5 to 71.2)                         | 0.1 (-0.2 to 0.4)            | 0.50    |

| Biomarker      | ARIC                                        |                       |         | FRAMINGHAM                                  |                       |         | HOMAGE                                      |                       |         |
|----------------|---------------------------------------------|-----------------------|---------|---------------------------------------------|-----------------------|---------|---------------------------------------------|-----------------------|---------|
|                | C-index (CI 95%)<br>clinical +<br>biomarker | Δ c-index<br>(CI 95%) | p-value | C-index (CI 95%)<br>clinical +<br>biomarker | Δ c-index<br>(CI 95%) | p-value | C-index (CI 95%)<br>clinical +<br>biomarker | Δ c-index<br>(CI 95%) | p-value |
| IL8            | 69.8 (65.0 to 74.7)                         | 0.1 (-0.3 to 0.4)     | 0.74    | 70.1 (64.9 to 75.3)                         | 0.9 (-1.2 to 3.0)     | 0.38    | 68.6 (65.7 to 71.4)                         | 0.3 (-0.2 to 0.8)     | 0.26    |
| ITGB1BP2       | 71.5 (66.8 to 76.2)                         | 2.0 (-0.6 to 4.6)     | 0.13    | 69.4 (64.1 to 74.6)                         | 0.2 (-0.5 to 0.9)     | 0.62    | 68.4 (65.6 to 71.2)                         | 0.1 (-0.2 to 0.5)     | 0.52    |
| ITGB2          | 69.4 (64.5 to 74.2)                         | -0.0 (-0.1 to 0.1)    | 0.50    | 69.3 (64.0 to 74.6)                         | 0.2 (-0.9 to 1.4)     | 0.67    | 68.6 (65.8 to 71.5)                         | 0.4 (-0.1 to 0.8)     | 0.096   |
| JAM-A          | 71.0 (66.2 to 75.7)                         | 1.6 (-0.6 to 3.8)     | 0.15    | 70.7 (65.5 to 75.9)                         | 1.7 (-0.3 to 3.7)     | 0.10    | 68.9 (66.1 to 71.8)                         | 0.7 (0.0 to 1.3)      | 0.049   |
| KIM1           | 69.5 (64.7 to 74.3)                         | 0.0 (-0.7 to 0.7)     | 0.94    | 70.9 (65.8 to 76.1)                         | 1.7 (-0.4 to 3.9)     | 0.11    | 69.1 (66.3 to 71.9)                         | 0.8 (-0.0 to 1.7)     | 0.057   |
| KLK6           | 69.4 (64.5 to 74.2)                         | -0.0 (-0.0 to 0.0)    | 0.10    | 69.6 (64.3 to 74.8)                         | 0.5 (-0.8 to 1.9)     | 0.41    | 68.3 (65.5 to 71.1)                         | 0.0 (-0.2 to 0.2)     | 0.79    |
| LAP TGF-beta-1 | 70.0 (65.2 to 74.9)                         | 0.3 (-0.3 to 0.9)     | 0.34    | 70.1 (64.8 to 75.3)                         | 0.8 (-0.9 to 2.6)     | 0.33    | 69.0 (66.2 to 71.8)                         | 0.7 (0.1 to 1.4)      | 0.035   |
| LDL receptor   | 69.6 (64.8 to 74.4)                         | 0.2 (-0.9 to 1.4)     | 0.71    | 69.0 (63.8 to 74.3)                         | -0.0 (-0.5 to 0.4)    | 0.95    | 68.4 (65.5 to 71.2)                         | 0.1 (-0.3 to 0.5)     | 0.59    |
| LEP            | 70.1 (65.3 to 74.9)                         | 0.6 (-1.1 to 2.3)     | 0.46    | 69.2 (63.9 to 74.4)                         | -0.0 (-0.5 to 0.4)    | 0.87    | 68.3 (65.5 to 71.2)                         | 0.0 (-0.1 to 0.1)     | 0.47    |
| LIF-R          | 70.1 (65.3 to 74.9)                         | 0.3 (-1.0 to 1.6)     | 0.64    | 69.2 (63.9 to 74.5)                         | 0.0 (-1.1 to 1.1)     | 0.97    | 68.5 (65.6 to 71.3)                         | 0.2 (-0.1 to 0.5)     | 0.24    |
| LOX-1          | 71.1 (66.3 to 75.9)                         | 1.6 (-0.8 to 4.0)     | 0.18    | 69.8 (64.6 to 75.0)                         | 0.6 (-1.0 to 2.2)     | 0.47    | 69.2 (66.4 to 72.0)                         | 0.9 (0.0 to 1.9)      | 0.045   |
| LPL            | 69.7 (64.9 to 74.5)                         | 0.2 (-0.7 to 1.1)     | 0.63    | 70.2 (65.1 to 75.4)                         | 1.0 (-0.5 to 2.6)     | 0.19    | 68.3 (65.4 to 71.1)                         | -0.0 (-0.0 to 0.0)    | 0.90    |
| LTBR           | 70.1 (65.3 to 74.9)                         | 0.7 (-0.6 to 2.0)     | 0.29    | 69.2 (63.9 to 74.5)                         | 0.1 (-1.0 to 1.3)     | 0.80    | 69.0 (66.2 to 71.9)                         | 0.8 (0.0 to 1.5)      | 0.042   |
| MARCO          | 69.4 (64.6 to 74.3)                         | -0.1 (-0.2 to 0.1)    | 0.27    | 69.2 (63.9 to 74.4)                         | -0.0 (-0.1 to 0.1)    | 0.58    | 68.3 (65.4 to 71.1)                         | 0.0 (-0.1 to 0.1)     | 0.88    |
| MB             | 70.1 (65.3 to 74.9)                         | 0.7 (-1.3 to 2.7)     | 0.48    | 69.9 (64.7 to 75.1)                         | 0.9 (-0.9 to 2.6)     | 0.33    | 68.3 (65.4 to 71.1)                         | 0.0 (-0.2 to 0.2)     | 0.86    |
| MCP-1          | 69.4 (64.5 to 74.2)                         | 0.0 (-0.1 to 0.1)     | 0.89    | 69.0 (63.8 to 74.3)                         | 0.0 (-1.0 to 1.0)     | 0.98    | 68.8 (66.0 to 71.7)                         | 0.6 (-0.0 to 1.2)     | 0.062   |
| MCP-2          | 70.7 (65.9 to 75.5)                         | 1.0 (-0.7 to 2.6)     | 0.25    | 70.1 (64.9 to 75.2)                         | 0.8 (-0.7 to 2.4)     | 0.27    | 68.7 (65.9 to 71.5)                         | 0.5 (-0.1 to 1.0)     | 0.10    |
| MCP-3          | 69.8 (65.0 to 74.7)                         | 0.1 (-0.3 to 0.5)     | 0.66    | 70.2 (65.0 to 75.4)                         | 1.0 (-1.1 to 3.0)     | 0.34    | 69.1 (66.3 to 72.0)                         | 0.9 (0.1 to 1.7)      | 0.035   |
| MCP-4          | 71.0 (66.2 to 75.7)                         | 1.2 (-0.9 to 3.3)     | 0.25    | 69.4 (64.1 to 74.6)                         | 0.2 (-0.7 to 1.0)     | 0.70    | 68.3 (65.5 to 71.1)                         | 0.0 (-0.1 to 0.1)     | 0.65    |
| MEPE           | 69.7 (64.9 to 74.5)                         | 0.3 (-1.3 to 1.9)     | 0.71    | 69.1 (63.8 to 74.4)                         | 0.1 (-0.7 to 0.8)     | 0.86    | 68.4 (65.5 to 71.2)                         | 0.1 (-0.2 to 0.4)     | 0.60    |
| MERTK          | 69.6 (64.7 to 74.4)                         | 0.1 (-0.3 to 0.4)     | 0.68    | 69.2 (63.9 to 74.4)                         | -0.0 (-0.2 to 0.1)    | 0.73    | 68.8 (66.0 to 71.7)                         | 0.6 (-0.2 to 1.3)     | 0.13    |
| MMP-1          | 69.7 (64.9 to 74.6)                         | -0.0 (-0.3 to 0.2)    | 0.90    | 69.4 (64.2 to 74.6)                         | 0.2 (-0.6 to 1.1)     | 0.62    | 68.5 (65.7 to 71.4)                         | 0.3 (-0.2 to 0.7)     | 0.25    |
| MMP-10         | 69.9 (65.1 to 74.7)                         | 0.2 (-0.7 to 1.0)     | 0.74    | 69.3 (64.0 to 74.5)                         | 0.1 (-0.5 to 0.6)     | 0.83    | 68.3 (65.5 to 71.2)                         | 0.0 (-0.1 to 0.2)     | 0.59    |
| MMP12          | 71.7 (66.9 to 76.4)                         | 2.2 (-0.3 to 4.7)     | 0.088   | 70.6 (65.4 to 75.8)                         | 1.4 (-0.5 to 3.3)     | 0.15    | 69.0 (66.2 to 71.8)                         | 0.8 (-0.1 to 1.6)     | 0.091   |
| MMP-2          | 70.3 (65.5 to 75.0)                         | 0.9 (-1.1 to 2.8)     | 0.38    | 69.0 (63.7 to 74.3)                         | -0.0 (-0.6 to 0.6)    | 0.99    | 69.4 (66.6 to 72.3)                         | 1.2 (0.3 to 2.0)      | 0.011   |
| MMP-3          | 69.8 (65.0 to 74.6)                         | 0.4 (-0.5 to 1.3)     | 0.39    | 69.2 (63.9 to 74.5)                         | 0.2 (-0.4 to 0.7)     | 0.53    | 69.1 (66.3 to 72.0)                         | 0.9 (0.1 to 1.6)      | 0.021   |
| MMP7           | 69.6 (64.8 to 74.5)                         | 0.2 (-0.9 to 1.2)     | 0.76    | 70.2 (65.0 to 75.4)                         | 1.0 (-1.0 to 2.9)     | 0.33    | 68.4 (65.6 to 71.3)                         | 0.2 (-0.2 to 0.6)     | 0.42    |
| MMP-9          | 69.5 (64.6 to 74.3)                         | 0.1 (-0.5 to 0.6)     | 0.79    | 72.5 (67.4 to 77.6)                         | 3.5 (0.6 to 6.3)      | 0.016   | 68.8 (66.0 to 71.7)                         | 0.6 (-0.1 to 1.2)     | 0.085   |
| MPO            | 69.8 (65.0 to 74.6)                         | 0.4 (-1.0 to 1.8)     | 0.55    | 70.3 (65.1 to 75.5)                         | 1.2 (-0.9 to 3.3)     | 0.24    | 68.7 (65.9 to 71.5)                         | 0.4 (-0.2 to 1.0)     | 0.19    |
| NEMO           | 71.1 (66.3 to 75.8)                         | 1.6 (-0.6 to 3.8)     | 0.15    | 69.2 (63.9 to 74.4)                         | -0.0 (-0.2 to 0.2)    | 0.83    | 68.6 (65.8 to 71.4)                         | 0.3 (-0.2 to 0.9)     | 0.25    |
| Notch 3        | 69.4 (64.5 to 74.2)                         | 0.0 (-0.1 to 0.1)     | 1.00    | 69.2 (63.9 to 74.5)                         | 0.2 (-1.0 to 1.4)     | 0.76    | 68.6 (65.7 to 71.4)                         | 0.3 (-0.1 to 0.7)     | 0.18    |
| NT-3           | 70.0 (65.2 to 74.8)                         | 0.2 (-0.4 to 0.9)     | 0.47    | 69.5 (64.3 to 74.7)                         | 0.3 (-0.3 to 1.0)     | 0.32    | 68.4 (65.6 to 71.3)                         | 0.1 (-0.2 to 0.5)     | 0.37    |
| NT-proBNP      | 77.0 (72.7 to 81.2)                         | 7.6 (3.6 to 11.5)     | 0.0001  | 73.9 (69.0 to 78.8)                         | 4.9 (1.3 to 8.4)      | 0.007   | 73.9 (71.3 to 76.6)                         | 5.7 (3.7 to 7.6)      | <0.0001 |

| Biomarker      | ARIC                                        |                       |         | FRAMINGHAM                                  |                       |         | HOMAGE                                      |                       |         |
|----------------|---------------------------------------------|-----------------------|---------|---------------------------------------------|-----------------------|---------|---------------------------------------------|-----------------------|---------|
|                | C-index (CI 95%)<br>clinical +<br>biomarker | Δ c-index<br>(CI 95%) | p-value | C-index (CI 95%)<br>clinical +<br>biomarker | Δ c-index<br>(CI 95%) | p-value | C-index (CI 95%)<br>clinical +<br>biomarker | Δ c-index<br>(CI 95%) | p-value |
| OPG            | 69.3 (64.4 to 74.1)                         | -0.1 (-1.0 to 0.8)    | 0.81    | 70.4 (65.2 to 75.6)                         | 1.4 (-0.5 to 3.2)     | 0.14    | 69.6 (66.9 to 72.4)                         | 1.4 (0.4 to 2.4)      | 0.006   |
| OPN            | 69.5 (64.7 to 74.4)                         | 0.1 (-0.7 to 1.0)     | 0.75    | 68.9 (63.6 to 74.2)                         | -0.2 (-1.0 to 0.7)    | 0.68    | 69.6 (66.8 to 72.4)                         | 1.3 (0.2 to 2.4)      | 0.017   |
| OSM            | 70.2 (65.3 to 75.0)                         | 0.4 (-0.5 to 1.3)     | 0.41    | 72.6 (67.6 to 77.7)                         | 3.4 (0.4 to 6.4)      | 0.024   | 68.8 (66.0 to 71.6)                         | 0.5 (-0.1 to 1.1)     | 0.081   |
| PAI            | 70.7 (66.0 to 75.5)                         | 1.3 (-0.8 to 3.5)     | 0.21    | 69.2 (63.9 to 74.4)                         | 0.1 (-0.8 to 1.0)     | 0.80    | 68.3 (65.5 to 71.1)                         | 0.0 (-0.1 to 0.2)     | 0.70    |
| PAPPA          | 69.5 (64.6 to 74.3)                         | -0.0 (-0.1 to 0.1)    | 0.80    | 69.2 (63.9 to 74.4)                         | -0.0 (-0.4 to 0.3)    | 0.90    | 68.7 (65.8 to 71.5)                         | 0.4 (-0.3 to 1.0)     | 0.23    |
| PAR-1          | 70.4 (65.6 to 75.2)                         | 0.9 (-0.8 to 2.7)     | 0.28    | 69.3 (64.1 to 74.6)                         | 0.1 (-0.4 to 0.7)     | 0.67    | 69.0 (66.2 to 71.8)                         | 0.7 (-0.2 to 1.6)     | 0.10    |
| PARP-1         | 69.9 (65.1 to 74.7)                         | 0.5 (-0.3 to 1.3)     | 0.26    | 69.3 (64.1 to 74.6)                         | 0.1 (-0.4 to 0.7)     | 0.67    | 68.7 (65.8 to 71.5)                         | 0.4 (-0.2 to 1.0)     | 0.21    |
| PCSK9          | 70.3 (65.5 to 75.1)                         | 0.9 (-0.8 to 2.5)     | 0.29    | 69.0 (63.8 to 74.3)                         | -0.0 (-0.2 to 0.2)    | 0.93    | 68.6 (65.7 to 71.4)                         | 0.3 (-0.1 to 0.7)     | 0.10    |
| PDGF subunit A | 72.1 (67.4 to 76.8)                         | 2.7 (0.1 to 5.3)      | 0.041   | 69.6 (64.3 to 74.8)                         | 0.5 (-0.8 to 1.8)     | 0.43    | 68.5 (65.7 to 71.4)                         | 0.3 (-0.1 to 0.6)     | 0.14    |
| PDGF subunit B | 72.5 (67.9 to 77.2)                         | 3.0 (0.3 to 5.8)      | 0.030   | 69.2 (64.0 to 74.5)                         | 0.0 (-0.5 to 0.5)     | 0.86    | 68.6 (65.8 to 71.4)                         | 0.3 (-0.2 to 0.9)     | 0.23    |
| PD-L1          | 69.8 (65.0 to 74.7)                         | 0.1 (-1.0 to 1.2)     | 0.88    | 69.6 (64.4 to 74.9)                         | 0.4 (-1.1 to 2.0)     | 0.56    | 68.5 (65.6 to 71.3)                         | 0.2 (-0.3 to 0.7)     | 0.43    |
| PD-L2          | 69.7 (64.9 to 74.5)                         | 0.2 (-0.7 to 1.1)     | 0.67    | 69.2 (64.0 to 74.5)                         | 0.0 (-0.3 to 0.3)     | 0.83    | 68.9 (66.1 to 71.8)                         | 0.7 (-0.2 to 1.5)     | 0.12    |
| PECAM-1        | 70.6 (65.8 to 75.3)                         | 1.2 (-0.7 to 3.0)     | 0.22    | 69.8 (64.6 to 75.1)                         | 0.8 (-0.6 to 2.2)     | 0.24    | 68.7 (65.9 to 71.5)                         | 0.4 (-0.1 to 1.0)     | 0.098   |
| PGF            | 70.6 (65.8 to 75.3)                         | 1.1 (-1.2 to 3.4)     | 0.36    | 69.4 (64.2 to 74.7)                         | 0.2 (-1.0 to 1.5)     | 0.72    | 69.0 (66.2 to 71.8)                         | 0.8 (-0.1 to 1.7)     | 0.10    |
| PGLYRP1        | 69.5 (64.7 to 74.4)                         | 0.1 (-0.5 to 0.7)     | 0.77    | 69.1 (63.8 to 74.3)                         | 0.0 (-0.4 to 0.4)     | 0.92    | 69.2 (66.4 to 72.0)                         | 0.9 (0.1 to 1.7)      | 0.031   |
| PI3            | 69.4 (64.6 to 74.2)                         | 0.0 (-1.3 to 1.3)     | 0.97    | 69.1 (63.9 to 74.4)                         | 0.1 (-0.3 to 0.5)     | 0.66    | 68.4 (65.6 to 71.3)                         | 0.1 (-0.2 to 0.4)     | 0.36    |
| PIgR           | 70.8 (66.0 to 75.5)                         | 1.3 (-1.3 to 3.8)     | 0.32    | 69.7 (64.4 to 74.9)                         | 0.5 (-0.9 to 1.8)     | 0.52    | 68.7 (65.9 to 71.6)                         | 0.4 (-0.2 to 1.0)     | 0.14    |
| PLC            | 69.9 (65.1 to 74.8)                         | 0.6 (-0.8 to 1.9)     | 0.41    | 70.9 (65.7 to 76.0)                         | 1.8 (-0.5 to 4.2)     | 0.12    | 69.2 (66.3 to 72.0)                         | 0.9 (0.1 to 1.7)      | 0.033   |
| PON3           | 69.6 (64.8 to 74.5)                         | 0.2 (-0.8 to 1.2)     | 0.64    | 69.7 (64.5 to 74.9)                         | 0.7 (-0.8 to 2.1)     | 0.36    | 69.0 (66.2 to 71.8)                         | 0.7 (0.0 to 1.5)      | 0.049   |
| PRELP          | 70.6 (65.8 to 75.3)                         | 1.1 (-0.9 to 3.1)     | 0.29    | 70.4 (65.1 to 75.6)                         | 1.2 (-0.8 to 3.1)     | 0.25    | 68.6 (65.8 to 71.4)                         | 0.3 (-0.3 to 1.0)     | 0.27    |
| PRSS27         | 69.5 (64.7 to 74.3)                         | 0.0 (-0.4 to 0.4)     | 0.96    | 71.1 (66.0 to 76.3)                         | 1.9 (-0.3 to 4.1)     | 0.085   | 68.3 (65.4 to 71.1)                         | -0.0 (-0.1 to 0.1)    | 0.74    |
| PRSS8          | 69.9 (65.1 to 74.7)                         | 0.5 (-1.0 to 1.9)     | 0.53    | 69.2 (64.0 to 74.5)                         | 0.0 (-0.4 to 0.4)     | 0.96    | 68.4 (65.6 to 71.3)                         | 0.1 (-0.3 to 0.6)     | 0.55    |
| PRTN3          | 70.1 (65.2 to 74.9)                         | 0.7 (-0.7 to 2.0)     | 0.33    | 70.2 (65.0 to 75.4)                         | 1.2 (-0.9 to 3.2)     | 0.27    | 69.0 (66.1 to 71.8)                         | 0.7 (-0.1 to 1.4)     | 0.068   |
| PSGL-1         | 69.7 (64.9 to 74.5)                         | 0.2 (-0.8 to 1.2)     | 0.65    | 69.1 (63.8 to 74.4)                         | -0.1 (-0.4 to 0.2)    | 0.52    | 68.6 (65.7 to 71.4)                         | 0.3 (-0.2 to 0.8)     | 0.23    |
| PSP-D          | 70.8 (66.0 to 75.5)                         | 1.4 (-0.5 to 3.3)     | 0.15    | 69.7 (64.5 to 74.9)                         | 0.7 (-0.7 to 2.0)     | 0.34    | 69.4 (66.6 to 72.2)                         | 1.1 (0.2 to 2.1)      | 0.018   |
| PTX3           | 70.9 (66.1 to 75.7)                         | 1.4 (-0.8 to 3.6)     | 0.20    | 69.6 (64.3 to 74.9)                         | 0.4 (-1.6 to 2.3)     | 0.70    | 68.9 (66.1 to 71.7)                         | 0.6 (-0.0 to 1.3)     | 0.064   |
| RAGE           | 71.1 (66.4 to 75.9)                         | 1.7 (-0.6 to 3.9)     | 0.14    | 69.7 (64.5 to 75.0)                         | 0.5 (-0.4 to 1.5)     | 0.25    | 68.4 (65.6 to 71.2)                         | 0.1 (-0.2 to 0.5)     | 0.45    |
| RARRES2        | 69.7 (64.9 to 74.5)                         | 0.3 (-0.5 to 1.2)     | 0.46    | 69.8 (64.5 to 75.0)                         | 0.7 (-0.9 to 2.3)     | 0.37    | 69.3 (66.5 to 72.1)                         | 1.0 (0.1 to 2.0)      | 0.026   |
| REN            | 69.8 (65.0 to 74.6)                         | 0.3 (-0.7 to 1.3)     | 0.58    | 70.1 (64.9 to 75.4)                         | 0.9 (-0.7 to 2.6)     | 0.27    | 69.1 (66.3 to 71.9)                         | 0.8 (-0.2 to 1.8)     | 0.10    |
| RETN           | 69.4 (64.5 to 74.2)                         | 0.0 (-0.1 to 0.1)     | 0.97    | 69.7 (64.5 to 75.0)                         | 0.7 (-0.7 to 2.1)     | 0.33    | 69.1 (66.3 to 71.9)                         | 0.8 (0.0 to 1.6)      | 0.039   |
| SCF            | 70.3 (65.5 to 75.1)                         | 0.8 (-1.0 to 2.7)     | 0.38    | 70.5 (65.3 to 75.7)                         | 1.3 (-0.5 to 3.0)     | 0.15    | 68.3 (65.4 to 71.1)                         | -0.0 (-0.1 to 0.0)    | 0.63    |
| SCGB3A2        | 69.6 (64.7 to 74.4)                         | 0.2 (-0.4 to 0.7)     | 0.54    | 69.6 (64.4 to 74.9)                         | 0.6 (-0.8 to 2.0)     | 0.39    | 68.4 (65.5 to 71.2)                         | 0.1 (-0.2 to 0.4)     | 0.57    |
| SELE           | 69.4 (64.6 to 74.3)                         | 0.0 (-0.2 to 0.3)     | 0.78    | 69.6 (64.3 to 74.8)                         | 0.5 (-0.6 to 1.6)     | 0.34    | 68.5 (65.7 to 71.4)                         | 0.3 (-0.2 to 0.7)     | 0.23    |

| Biomarker | ARIC                                        |                       |         | FRAMINGHAM                                  |                       |         | HOMAGE                                      |                       |         |
|-----------|---------------------------------------------|-----------------------|---------|---------------------------------------------|-----------------------|---------|---------------------------------------------|-----------------------|---------|
|           | C-index (CI 95%)<br>clinical +<br>biomarker | Δ c-index<br>(CI 95%) | p-value | C-index (CI 95%)<br>clinical +<br>biomarker | Δ c-index<br>(CI 95%) | p-value | C-index (CI 95%)<br>clinical +<br>biomarker | Δ c-index<br>(CI 95%) | p-value |
| SELP      | 71.1 (66.3 to 75.8)                         | 1.7 (-0.6 to 4.0)     | 0.15    | 70.6 (65.4 to 75.8)                         | 1.6 (-0.4 to 3.5)     | 0.11    | 68.8 (66.0 to 71.6)                         | 0.5 (-0.0 to 1.0)     | 0.071   |
| SERPINA12 | 69.8 (65.0 to 74.6)                         | 0.3 (-0.6 to 1.2)     | 0.46    | 69.9 (64.7 to 75.1)                         | 0.7 (-0.9 to 2.3)     | 0.41    | 68.3 (65.5 to 71.1)                         | 0.0 (-0.1 to 0.2)     | 0.73    |
| SHPS-1    | 69.5 (64.7 to 74.3)                         | 0.1 (-0.8 to 1.0)     | 0.80    | 69.0 (63.7 to 74.3)                         | -0.0 (-0.6 to 0.6)    | 0.97    | 68.5 (65.6 to 71.3)                         | 0.2 (-0.1 to 0.5)     | 0.21    |
| SIRT2     | 71.9 (67.2 to 76.6)                         | 2.2 (-0.3 to 4.6)     | 0.083   | 69.2 (64.0 to 74.5)                         | 0.0 (-0.6 to 0.6)     | 0.97    | 68.5 (65.7 to 71.3)                         | 0.2 (-0.3 to 0.7)     | 0.38    |
| SLAMF1    | 70.2 (65.4 to 75.0)                         | 0.5 (-1.0 to 1.9)     | 0.52    | 69.3 (64.1 to 74.6)                         | 0.1 (-0.0 to 0.3)     | 0.076   | 68.8 (66.0 to 71.6)                         | 0.5 (-0.2 to 1.3)     | 0.18    |
| SLAMF7    | 69.5 (64.7 to 74.3)                         | 0.0 (-0.1 to 0.1)     | 0.86    | 69.3 (64.0 to 74.5)                         | 0.1 (-0.2 to 0.4)     | 0.65    | 69.5 (66.7 to 72.3)                         | 1.2 (0.1 to 2.3)      | 0.035   |
| SOD2      | 69.5 (64.7 to 74.4)                         | 0.1 (-0.3 to 0.4)     | 0.76    | 69.2 (63.9 to 74.4)                         | -0.0 (-0.1 to 0.1)    | 0.57    | 68.9 (66.1 to 71.7)                         | 0.6 (-0.1 to 1.3)     | 0.10    |
| SORT1     | 69.7 (64.8 to 74.5)                         | 0.2 (-0.7 to 1.1)     | 0.66    | 69.4 (64.2 to 74.7)                         | 0.2 (-0.4 to 0.8)     | 0.44    | 69.3 (66.5 to 72.1)                         | 1.0 (0.1 to 1.9)      | 0.033   |
| SPON1     | 70.8 (66.0 to 75.5)                         | 1.4 (-1.0 to 3.8)     | 0.24    | 70.0 (64.8 to 75.2)                         | 1.0 (-0.9 to 2.9)     | 0.30    | 69.7 (66.9 to 72.5)                         | 1.4 (0.4 to 2.4)      | 0.004   |
| SPON2     | 70.6 (65.9 to 75.4)                         | 1.2 (-1.2 to 3.5)     | 0.34    | 69.4 (64.1 to 74.6)                         | 0.2 (-0.2 to 0.5)     | 0.35    | 69.0 (66.2 to 71.8)                         | 0.7 (-0.2 to 1.6)     | 0.10    |
| SRC       | 72.0 (67.3 to 76.7)                         | 2.5 (-0.0 to 5.1)     | 0.053   | 69.3 (64.0 to 74.5)                         | 0.1 (-0.1 to 0.2)     | 0.38    | 68.4 (65.6 to 71.2)                         | 0.1 (-0.3 to 0.6)     | 0.53    |
| ST1A1     | 71.3 (66.5 to 76.0)                         | 1.5 (-0.8 to 3.8)     | 0.20    | 69.4 (64.2 to 74.7)                         | 0.2 (-0.7 to 1.1)     | 0.64    | 68.4 (65.6 to 71.3)                         | 0.2 (-0.2 to 0.5)     | 0.43    |
| ST2       | 69.2 (64.3 to 74.0)                         | -0.2 (-1.1 to 0.7)    | 0.64    | 71.1 (66.0 to 76.2)                         | 2.1 (-0.2 to 4.3)     | 0.077   | 69.1 (66.2 to 71.9)                         | 0.8 (-0.0 to 1.6)     | 0.057   |
| STAMPB    | 71.3 (66.6 to 76.1)                         | 1.6 (-0.6 to 3.8)     | 0.16    | 69.2 (63.9 to 74.4)                         | -0.0 (-0.8 to 0.7)    | 0.96    | 68.4 (65.5 to 71.2)                         | 0.1 (-0.2 to 0.4)     | 0.57    |
| STK4      | 71.4 (66.7 to 76.2)                         | 1.9 (-0.5 to 4.4)     | 0.12    | 69.2 (63.9 to 74.5)                         | 0.0 (-0.3 to 0.3)     | 1.00    | 68.5 (65.6 to 71.3)                         | 0.2 (-0.3 to 0.7)     | 0.38    |
| TF        | 69.7 (64.8 to 74.5)                         | 0.2 (-0.4 to 0.8)     | 0.57    | 70.5 (65.4 to 75.7)                         | 1.3 (-0.5 to 3.2)     | 0.15    | 68.5 (65.7 to 71.4)                         | 0.2 (-0.2 to 0.7)     | 0.28    |
| TFF3      | 70.9 (66.2 to 75.7)                         | 1.5 (-0.9 to 3.9)     | 0.21    | 69.8 (64.6 to 75.1)                         | 0.8 (-0.6 to 2.2)     | 0.25    | 69.9 (67.1 to 72.7)                         | 1.6 (0.5 to 2.7)      | 0.003   |
| TFPI      | 69.7 (64.8 to 74.5)                         | 0.3 (-0.8 to 1.3)     | 0.59    | 69.0 (63.7 to 74.2)                         | -0.1 (-0.5 to 0.3)    | 0.71    | 68.3 (65.5 to 71.2)                         | 0.0 (-0.1 to 0.2)     | 0.37    |
| TGF-alpha | 71.3 (66.5 to 76.0)                         | 1.5 (-0.7 to 3.7)     | 0.17    | 72.3 (67.2 to 77.3)                         | 3.1 (0.2 to 6.0)      | 0.037   | 69.1 (66.3 to 71.9)                         | 0.9 (0.1 to 1.6)      | 0.032   |
| TGM2      | 69.8 (65.0 to 74.6)                         | 0.3 (-0.9 to 1.5)     | 0.62    | 71.1 (65.9 to 76.2)                         | 1.9 (-0.3 to 4.0)     | 0.094   | 69.3 (66.5 to 72.1)                         | 1.0 (0.0 to 2.1)      | 0.049   |
| THBS2     | 71.5 (66.8 to 76.2)                         | 2.0 (-0.8 to 4.8)     | 0.16    | 71.8 (66.7 to 76.9)                         | 2.6 (0.1 to 5.1)      | 0.042   | 68.7 (65.8 to 71.5)                         | 0.4 (-0.3 to 1.1)     | 0.26    |
| THPO      | 70.7 (66.0 to 75.5)                         | 1.3 (-0.7 to 3.2)     | 0.19    | 69.6 (64.3 to 74.8)                         | 0.4 (-0.5 to 1.2)     | 0.42    | 68.4 (65.5 to 71.2)                         | 0.1 (-0.2 to 0.4)     | 0.54    |
| TIE2      | 69.6 (64.7 to 74.4)                         | 0.1 (-0.4 to 0.6)     | 0.77    | 69.2 (64.0 to 74.5)                         | 0.0 (-0.5 to 0.6)     | 0.86    | 68.4 (65.5 to 71.2)                         | 0.1 (-0.2 to 0.4)     | 0.44    |
| TIMP4     | 69.4 (64.6 to 74.3)                         | 0.0 (-0.1 to 0.1)     | 0.62    | 69.2 (64.0 to 74.5)                         | 0.2 (-0.7 to 1.0)     | 0.65    | 69.1 (66.3 to 71.9)                         | 0.8 (0.1 to 1.5)      | 0.028   |
| TLT-2     | 69.4 (64.5 to 74.2)                         | -0.0 (-0.5 to 0.5)    | 0.98    | 69.2 (64.0 to 74.5)                         | 0.2 (-0.3 to 0.7)     | 0.46    | 68.5 (65.7 to 71.3)                         | 0.2 (-0.2 to 0.7)     | 0.33    |
| TM        | 69.7 (64.9 to 74.6)                         | 0.2 (-0.8 to 1.3)     | 0.64    | 70.0 (64.8 to 75.2)                         | 0.8 (-0.4 to 1.9)     | 0.18    | 68.5 (65.7 to 71.3)                         | 0.2 (-0.3 to 0.8)     | 0.39    |
| TNFB      | 69.8 (65.0 to 74.6)                         | 0.0 (-0.3 to 0.4)     | 0.78    | 69.8 (64.6 to 75.0)                         | 0.6 (-0.5 to 1.7)     | 0.27    | 68.3 (65.4 to 71.1)                         | 0.0 (-0.2 to 0.2)     | 0.88    |
| TNF-R1    | 70.0 (65.2 to 74.9)                         | 0.7 (-0.9 to 2.2)     | 0.40    | 69.4 (64.1 to 74.7)                         | 0.4 (-1.2 to 2.0)     | 0.65    | 69.4 (66.6 to 72.2)                         | 1.1 (0.2 to 2.1)      | 0.013   |
| TNF-R2    | 69.9 (65.1 to 74.7)                         | 0.5 (-1.0 to 2.0)     | 0.49    | 69.9 (64.6 to 75.1)                         | 0.8 (-1.0 to 2.7)     | 0.37    | 69.4 (66.6 to 72.2)                         | 1.1 (0.2 to 2.0)      | 0.020   |
| TNFRSF10A | 70.5 (65.7 to 75.2)                         | 1.0 (-0.9 to 2.8)     | 0.31    | 70.0 (64.8 to 75.2)                         | 0.8 (-0.9 to 2.5)     | 0.35    | 69.8 (67.0 to 72.6)                         | 1.5 (0.3 to 2.7)      | 0.013   |
| TNFRSF10C | 69.5 (64.6 to 74.3)                         | 0.1 (-0.3 to 0.5)     | 0.73    | 69.8 (64.5 to 75.0)                         | 0.7 (-0.7 to 2.1)     | 0.31    | 68.3 (65.5 to 71.2)                         | 0.1 (-0.3 to 0.4)     | 0.74    |
| TNFRSF11A | 70.6 (65.8 to 75.4)                         | 1.1 (-0.6 to 2.9)     | 0.21    | 69.3 (64.0 to 74.6)                         | 0.1 (-0.9 to 1.1)     | 0.85    | 69.4 (66.6 to 72.2)                         | 1.2 (0.1 to 2.2)      | 0.033   |
| TNFRSF13B | 69.6 (64.8 to 74.5)                         | 0.2 (-0.6 to 0.9)     | 0.68    | 69.2 (64.0 to 74.5)                         | 0.0 (-0.1 to 0.1)     | 0.70    | 69.9 (67.2 to 72.7)                         | 1.7 (0.5 to 2.9)      | 0.007   |



| Biomarker | ARIC                                        |                              |         | FRAMINGHAM                                  |                              |         | HOMAGE                                      |                              |         |
|-----------|---------------------------------------------|------------------------------|---------|---------------------------------------------|------------------------------|---------|---------------------------------------------|------------------------------|---------|
|           | C-index (CI 95%)<br>clinical +<br>biomarker | $\Delta$ c-index<br>(CI 95%) | p-value | C-index (CI 95%)<br>clinical +<br>biomarker | $\Delta$ c-index<br>(CI 95%) | p-value | C-index (CI 95%)<br>clinical +<br>biomarker | $\Delta$ c-index<br>(CI 95%) | p-value |
| TNFRSF14  | 69.5 (64.7 to 74.4)                         | 0.1 (-0.7 to 1.0)            | 0.73    | 69.7 (64.4 to 75.0)                         | 0.7 (-1.1 to 2.4)            | 0.44    | 69.3 (66.5 to 72.1)                         | 1.0 (0.1 to 1.9)             | 0.021   |
| TNFRSF9   | 70.4 (65.6 to 75.2)                         | 0.6 (-1.0 to 2.2)            | 0.46    | 69.5 (64.3 to 74.8)                         | 0.3 (-0.9 to 1.6)            | 0.62    | 68.8 (65.9 to 71.6)                         | 0.5 (-0.2 to 1.2)            | 0.16    |
| TNFSF13B  | 69.3 (64.4 to 74.1)                         | -0.1 (-1.3 to 1.1)           | 0.86    | 70.1 (64.9 to 75.3)                         | 1.1 (-0.8 to 2.9)            | 0.25    | 68.5 (65.7 to 71.3)                         | 0.2 (-0.1 to 0.6)            | 0.20    |
| TNFSF14   | 70.2 (65.4 to 75.0)                         | 0.5 (-0.8 to 1.7)            | 0.47    | 71.1 (66.0 to 76.2)                         | 1.9 (-0.4 to 4.2)            | 0.11    | 68.7 (65.9 to 71.5)                         | 0.4 (-0.2 to 1.1)            | 0.16    |
| t-PA      | 69.4 (64.6 to 74.3)                         | 0.0 (-0.2 to 0.2)            | 0.76    | 69.9 (64.7 to 75.1)                         | 0.9 (-0.6 to 2.4)            | 0.24    | 68.3 (65.5 to 71.2)                         | 0.1 (-0.1 to 0.2)            | 0.54    |
| TR        | 69.3 (64.5 to 74.2)                         | -0.1 (-1.1 to 0.9)           | 0.87    | 69.5 (64.2 to 74.7)                         | 0.4 (-1.0 to 1.9)            | 0.56    | 68.9 (66.1 to 71.8)                         | 0.7 (-0.0 to 1.3)            | 0.050   |
| TRAIL     | 71.1 (66.3 to 75.9)                         | 1.3 (-0.5 to 3.2)            | 0.16    | 69.6 (64.4 to 74.8)                         | 0.4 (-0.6 to 1.4)            | 0.41    | 68.4 (65.6 to 71.3)                         | 0.2 (-0.3 to 0.6)            | 0.44    |
| TRAIL-R2  | 72.9 (68.3 to 77.5)                         | 3.4 (0.3 to 6.6)             | 0.031   | 69.4 (64.2 to 74.7)                         | 0.2 (-1.1 to 1.5)            | 0.73    | 71.0 (68.3 to 73.8)                         | 2.7 (1.2 to 4.3)             | 0.0004  |
| TRANCE    | 69.8 (64.9 to 74.6)                         | -0.0 (-0.2 to 0.2)           | 0.93    | 69.3 (64.0 to 74.5)                         | 0.1 (-0.3 to 0.5)            | 0.76    | 68.6 (65.7 to 71.4)                         | 0.3 (-0.2 to 0.8)            | 0.26    |
| TR-AP     | 71.0 (66.2 to 75.8)                         | 1.6 (-0.5 to 3.7)            | 0.14    | 69.1 (63.8 to 74.4)                         | 0.1 (-0.2 to 0.3)            | 0.61    | 68.3 (65.5 to 71.1)                         | 0.0 (-0.2 to 0.3)            | 0.84    |
| TWEAK     | 70.9 (66.2 to 75.7)                         | 1.2 (-1.1 to 3.4)            | 0.32    | 71.5 (66.4 to 76.6)                         | 2.3 (0.0 to 4.6)             | 0.046   | 69.1 (66.3 to 71.9)                         | 0.9 (-0.2 to 1.9)            | 0.097   |
| uPA       | 69.4 (64.6 to 74.3)                         | 0.1 (-0.4 to 0.5)            | 0.82    | 69.1 (63.8 to 74.3)                         | 0.0 (-0.3 to 0.3)            | 0.92    | 68.5 (65.6 to 71.3)                         | 0.2 (-0.2 to 0.5)            | 0.29    |
| U-PAR     | 70.4 (65.6 to 75.2)                         | 1.0 (-1.2 to 3.1)            | 0.36    | 71.6 (66.4 to 76.7)                         | 2.5 (-0.3 to 5.4)            | 0.077   | 70.2 (67.4 to 73.0)                         | 2.0 (0.8 to 3.2)             | 0.001   |
| VEGFA     | 70.1 (65.3 to 74.9)                         | 0.3 (-0.9 to 1.6)            | 0.58    | 70.6 (65.5 to 75.8)                         | 1.4 (-0.8 to 3.7)            | 0.21    | 69.4 (66.7 to 72.2)                         | 1.2 (0.2 to 2.1)             | 0.017   |
| VEGFD     | 70.5 (65.7 to 75.3)                         | 1.0 (-1.2 to 3.1)            | 0.36    | 69.2 (63.9 to 74.4)                         | -0.0 (-0.1 to 0.1)           | 0.49    | 69.9 (67.1 to 72.7)                         | 1.6 (0.5 to 2.7)             | 0.003   |
| VSIG2     | 69.8 (65.0 to 74.6)                         | 0.3 (-0.5 to 1.1)            | 0.44    | 69.2 (64.0 to 74.5)                         | 0.0 (-0.1 to 0.2)            | 0.64    | 68.6 (65.8 to 71.5)                         | 0.4 (-0.3 to 1.1)            | 0.32    |
| vWF       | 69.4 (64.6 to 74.3)                         | 0.0 (-0.6 to 0.6)            | 0.94    | 69.4 (64.2 to 74.7)                         | 0.4 (-1.0 to 1.9)            | 0.58    | 69.0 (66.2 to 71.8)                         | 0.7 (0.0 to 1.5)             | 0.046   |
| XCL1      | 69.6 (64.8 to 74.4)                         | 0.1 (-0.6 to 0.8)            | 0.76    | 69.8 (64.6 to 75.0)                         | 0.6 (-1.2 to 2.4)            | 0.51    | 68.6 (65.8 to 71.4)                         | 0.3 (-0.2 to 0.9)            | 0.22    |

Protein names are available in Supplemental Table 1.

**Supplemental Figure 1: GO terms complex network analysis identifying 9 “key” mechanistic clusters related to HF occurrence.**

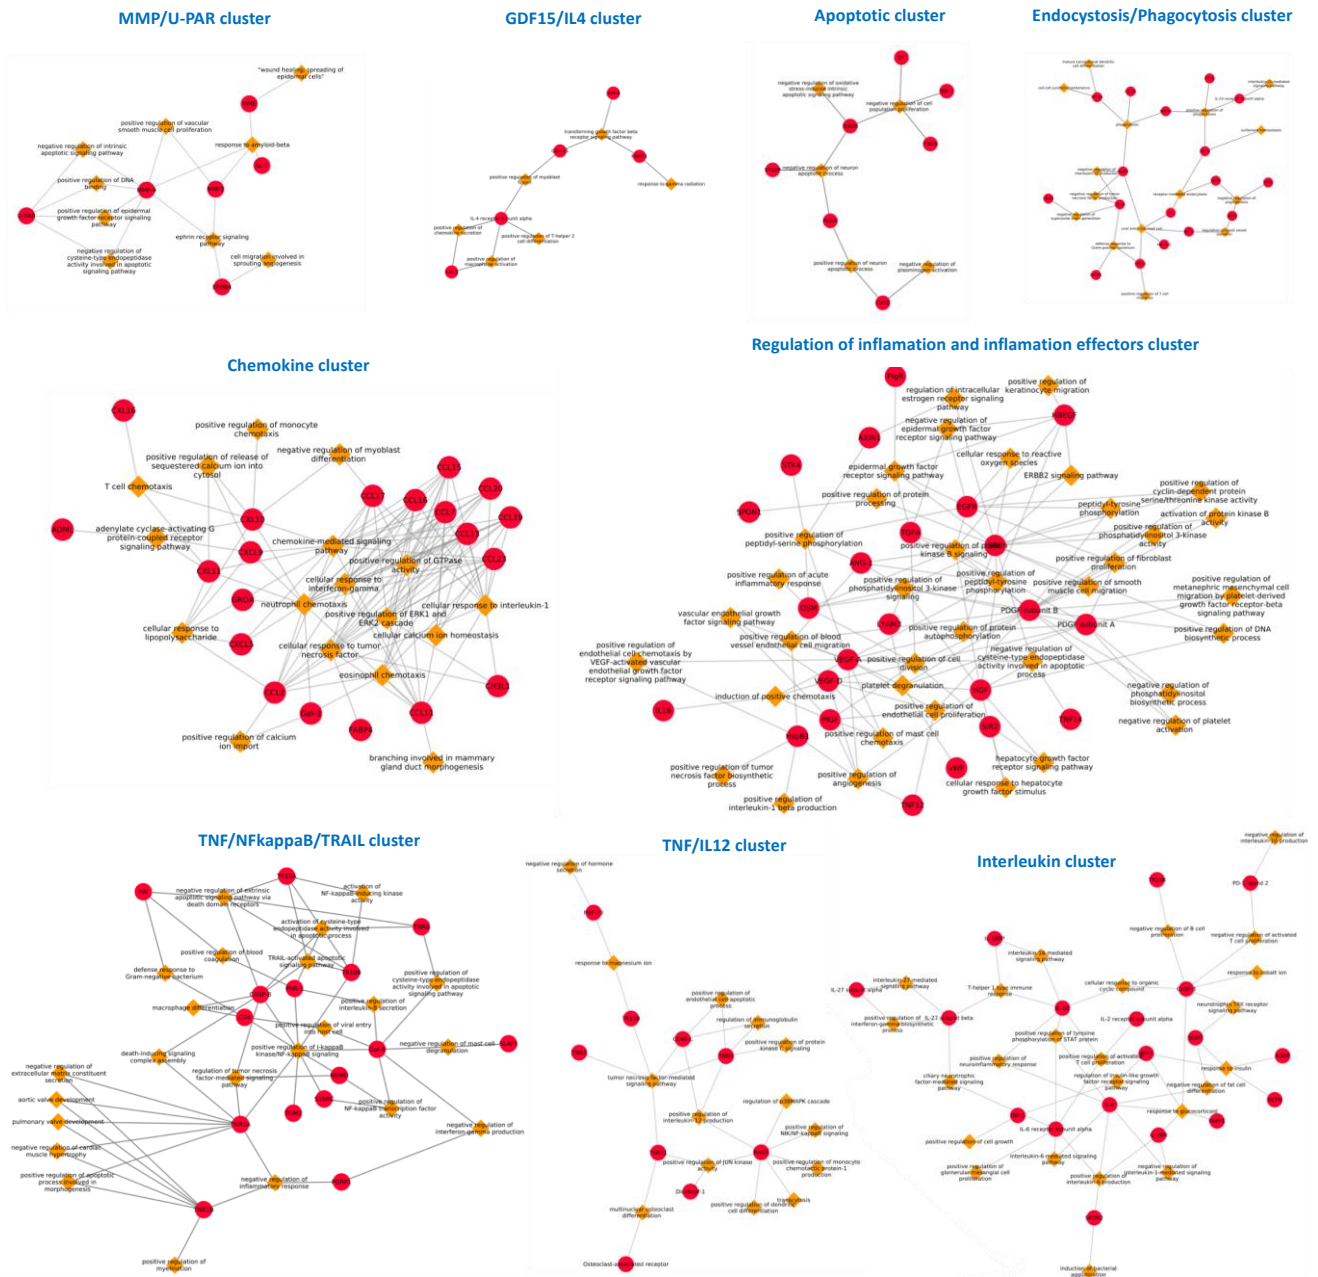

**Legend :** Overrepresented GO terms are represented by orange diamonds and biomarkers by red ellipses. Protein names are available in Supplemental Table 1.
